# 1 Dendritic domain-specific sampling of long-range axons shapes 2 feedforward and feedback connectivity of L5 neurons

3

4 Alessandro R. Galloni<sup>1,2</sup>, Zhiwen Ye<sup>1</sup> and Ede Rancz<sup>1\*</sup>

5 <sup>1</sup>The Francis Crick Institute, London, United Kingdom; <sup>2</sup>University College London, United Kingdom.

6 \*For correspondence: [ede.rancz@crick.ac.uk](mailto:ede.rancz@crick.ac.uk)

7

8

## 9 Abstract

10 Feedforward and feedback pathways interact in specific dendritic domains to enable cognitive functions  
11 such as predictive processing and learning. Based on axonal projections, hierarchically lower areas are  
12 thought to form synapses primarily on dendrites in middle cortical layers, while higher-order areas are  
13 posited to target dendrites in layer 1 and in deep layers. However, the extent to which functional  
14 synapses form in regions of axo-dendritic overlap has not been extensively studied. Here, we use viral  
15 tracing in the secondary visual cortex of mice to map brain-wide inputs to thick-tufted layer 5 pyramidal  
16 neurons. Furthermore, we provide a comprehensive map of input locations through subcellular  
17 optogenetic circuit mapping. We show that input pathways target distinct dendritic domains with far  
18 greater specificity than appears from their axonal branching, often deviating substantially from the  
19 canonical patterns. Common assumptions regarding the dendrite-level interaction of feedforward and  
20 feedback inputs may thus need revisiting.

## 21 Introduction

22 One of the key organizing principles of connectivity within the neocortex is thought to be hierarchy  
23 between cortical areas. This notion was originally proposed by Hubel & Wiesel (Hubel & Wiesel 1962) to  
24 account for the increasing receptive field complexity in areas progressively further from the retina. In  
25 purely feedforward (FF) networks, such as artificial neural networks used successfully in computer vision  
26 (LeCun et al 2015), hierarchy is generally defined by synaptic distance from the sensory periphery.  
27 However, in highly recurrent networks like the cortex, it is not possible to apply this definition consistently  
28 beyond the initial levels. Instead, the laminar patterns of axonal projections are often used to deduce  
29 relative levels of hierarchy. For example, the projection from primary to secondary visual cortex, which is  
30 classically defined as FF, is characterised by dense axon terminations in middle cortical layers  
31 (particularly L4). Meanwhile, the projection from secondary to primary visual cortex, used as the basis for  
32 defining feedback (FB), primarily targets L1 and to a lesser extent deeper layers (Rockland & Pandya  
33 1979). This pattern of FF and FB projections also appears in many other brain regions, and has been  
34 used as a proxy to describe the hierarchical relationships between a large number of areas across the  
35 brain (D'Souza et al 2016, D'Souza et al 2020, Felleman & Van Essen 1991, Harris et al 2019, Wang et al  
36 2020b, Zeng 2018).

37 Projections, however, do not guarantee functional connections. The link between the two is called Peters'  
38 rule, which postulates that the probability of synaptic connections can be predicted from the overlap  
39 between axonal and dendritic arbours (Rees et al 2017). While overlap between axons and dendrites is  
40 necessary for synapses to form, it is far from sufficient. The link between axo-dendritic overlap and  
41 connection probability may thus be overly simplistic and requires further scrutiny. While some studies  
42 have found support for Peters' rule at the level of functional synaptic connectivity for interneurons (Fino &  
43 Yuste 2011, Packer et al 2013, Rieubland et al 2014), its general applicability has been refuted, at least  
44 for local networks, by dense anatomical reconstructions of retinal (Briggman et al 2011, Helmstaedter et  
45 al 2013, Kim et al 2014, Krishnaswamy et al 2015) and cortical circuits (Kasthuri et al 2015, Lee et al  
46 2016). To investigate how this principle applies to long-range projections, a technique that has become  
47 widely adopted is subcellular channelrhodopsin-assisted circuit mapping (sCRACM). Here optogenetics is  
48 combined with spatially targeted optical stimulation to map the distribution of synaptic currents for a given  
49 input (Petreanu et al 2009). While this has been used to show that different presynaptic populations target  
50 dendritic subdomains with high specificity (Anastasiades et al 2021, Collins et al 2018, Hooks et al 2013,  
51 Yamawaki et al 2019), the extent to which this can be explained and predicted by the distribution of axons  
52 and dendrites remains largely an open question.

53 Whether axons target specific dendritic domains is a particularly important question in the case of layer 5  
54 pyramidal neurons (L5PN), given their central role in several theories of cortical computation (Aru et al  
55 2020, Guerguiev et al 2017, Larkum 2013, Richards et al 2019). For example, the interaction between FF  
56 and FB information streams across cortical layers (Larkum et al 2018) is thought to underlie sensory

57 perception (Larkum 2013, Takahashi et al 2020, Takahashi et al 2016) and implement global inference  
58 algorithms such as predictive coding (Shipp 2016). These theories all rely heavily on the assumption that  
59 FF connections target primarily basal dendrites while FB connections preferentially synapse onto the  
60 apical tuft, and would need to be revised should this not be true. This assumption in turn rests on Peter's  
61 rule, but the evidence for this remains circumstantial and a direct examination of Peters' rule across  
62 multiple input pathways to individual neurons remains to be done.

63 Here we present a comprehensive description of the functional input connectivity to thick-tufted layer 5  
64 (ttL5) pyramidal neurons in medial secondary visual cortex. In particular, we set out to answer three  
65 questions: determine the source of input connectivity to ttL5 neurons using monosynaptically restricted  
66 rabies tracing (Kim et al 2015, Reardon et al 2016), create a census of subcellular input maps using  
67 sCRACM, and test Peters' rule directly by comparing synaptic input maps to the respective axonal  
68 projection maps.

69

## 70 Results

71 To ensure recording from a homogeneous neuronal population, we used the Colgalt2-Cre mouse line  
72 which specifically labels subcortically projecting, thick-tufted layer 5 (ttL5) neurons (Groh et al 2010, Kim  
73 et al 2015). We focused our study on the medial secondary visual cortex (V2M) as higher order cortical  
74 regions are likely to receive a broader diversity of long-range inputs than primary sensory cortices. V2M is  
75 defined in the Mouse Brain In Stereotaxic Coordinates atlas (Franklin & Paxinos 2007) which can be used  
76 to guide viral injections. Furthermore, as this atlas is based on cytoarchitecture, thus V2M can be visually  
77 distinguished and selectively targeted in slice recordings, as has previously been done (Galloni et al  
78 2020, Young et al 2021). For whole-brain rabies tracing, on the other hand, we adopted the more recently  
79 developed Allen Common Coordinate Framework (CCFv3, (Wang et al 2020a). This atlas allowed us to  
80 localize individual neurons within 3D volumes of brain tissue, which is not possible using the Franklin &  
81 Paxinos atlas. Within the CCFv3, area V2M corresponds to VISpm, VISam, and RSPagl (Lyamzin &  
82 Benucci 2019), all of which are known to be visually responsive (Garrett et al 2014, Powell et al 2020).  
83 Treating V2M as a single area for this study was also supported by the observation that axonal  
84 projections to VISpm, VISam, and RSPagl are not substantially different (Figure S1, see Methods for  
85 details).

### 86 Brain-wide input map to V2M ttL5 pyramidal neurons

87 We employed a monosynaptically restricted rabies virus approach (Reardon et al 2016, Wickersham et al  
88 2007) to generate a presynaptic input map of V2M ttL5 neurons. Briefly, a mix of adeno-associated  
89 viruses carrying floxed N2c G-protein, or TVA-receptor and EGFP genes were injected into V2M of  
90 Colgalt2-Cre mice under stereotaxic guidance. Five to seven days later, mCherry expressing EnvA-CVS-

91 N2c-ΔG rabies virus was injected at the same location. After a further 10-12 days, brains were fixed and  
 92 imaged using serial section 2-photon tomography (Figure S2A). The resultant datasets were registered to  
 93 the Allen CCFv3 atlas and presynaptic cell bodies were detected and counted using an automated  
 94 pipeline (see Methods for details).

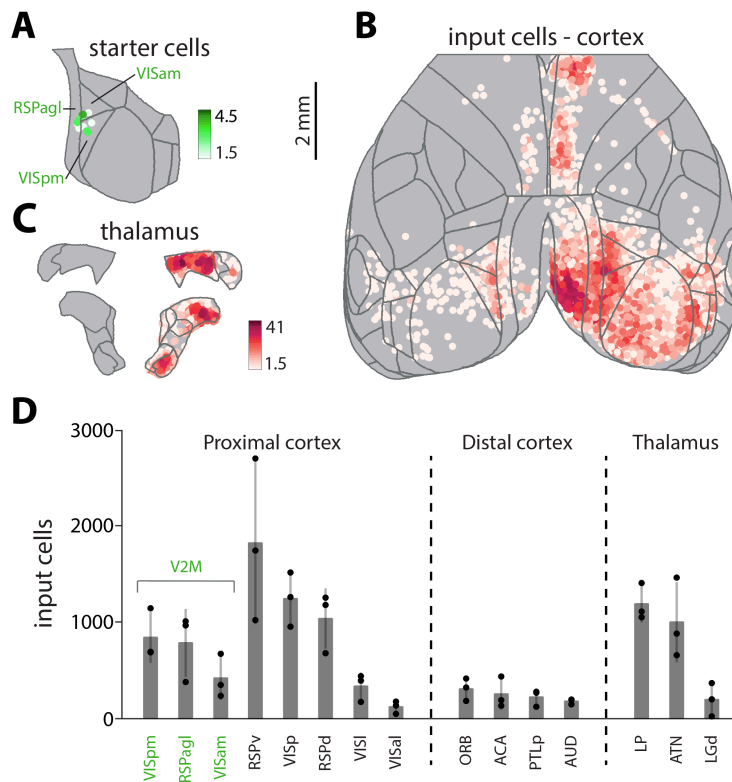

95  
 96 **Figure 1. Whole-brain input map to V2M ttL5 neurons.** **A.** Starter cell density map from an example experiment. **B.**  
 97 Cortical input cell density map projected onto the horizontal plane, same experiment as in **A.** **C.** Thalamic input cell  
 98 density map projected onto two coronal planes, same experiment as in **A.** Area names can be found in Figure S3;  
 99 density scales are in cells / 0.01 mm<sup>2</sup>. **D.** Input cell numbers for the most prominent input areas. Averages, standard  
 100 deviation, and individual experiments are show.

101 Cell density maps for an example experiment are shown in Figure 1. Starter cells were scattered across  
 102 V2M (Figure 1A) while presynaptic input neurons were detected in a broad range of cortical and  
 103 subcortical areas (Figure 1B,C). We have grouped the most prominent input areas into proximal cortex,  
 104 distal cortex, and thalamus (Figure 1D). The majority of input cells were found locally in V2M and in the  
 105 proximal cortical areas VISp and the granular retrosplenial cortex (RSPg, consisting of RSPd and RSPv).  
 106 Orbitofrontal cortex (ORB) and the anterior cingulate area (ACA) provided the most numerous distal  
 107 cortical inputs. Interestingly, while most cortical input cells were detected in the granular and infragranular  
 108 layers, especially layer 5, input from ORB was almost exclusively from layer 2/3 (Figure S2BC).  
 109 Prominent thalamic inputs were also observed, originating mainly in the lateral posterior nucleus (LP) and

110 anterior thalamic nuclei (ATN). Comprehensive cell counts for individual experiments can be found in  
111 Supplementary table 1.

112 To understand the organization of inputs onto tL5 neurons in V2M, we chose to further examine 7  
113 prominent input areas. VISp and V2M for FF input; RSPg, ACA and ORB for cortical FB input; and LP  
114 and ATN for thalamic FB connections. We designate local (V2M) input as FF, as tL5 neurons are  
115 considered the outputs of the cortical column, and have very limited local projections.

## 116 **Subcellular optogenetic input mapping reveals diverse targeting of dendritic** 117 **domains by input areas**

118 To determine the spatial distribution of synaptic inputs to tL5 neurons in V2M, we performed sCRACM  
119 experiments from selected input areas identified by the rabies tracing. Following expression of the  
120 optogenetic activator Chronos in different input areas (see methods for injection details), we made  
121 voltage-clamp recordings (at -70 mV) from tdTomato labelled (Colgalt2-Cre) tL5 neurons in V2M using  
122 acute brain slices. Optical stimulation with a 463 nm laser was spatially targeted using a digital  
123 micromirror device (Figure 2A). Sodium and potassium channels were blocked using TTX (1 $\mu$ m) and 4-  
124 AP (100  $\mu$ m) to ensure that evoked currents were restricted to directly stimulated nerve terminals and to  
125 enhance presynaptic release, respectively. The stimulus consisted of 24 x 12 spots of light in a 1000 x  
126 500  $\mu$ m grid aligned to the axis of the apical dendrite of the recorded neuron and covering the whole  
127 depth of cortex. We also quantified the total input from a given connection by recording synaptic currents  
128 evoked by full-field stimulation. To facilitate comparison between projections, we used the same laser  
129 intensity across all experiments.

130 Synaptic strength at each location was estimated by measuring the area of evoked synaptic currents  
131 (corresponding to charge; Figure 2B) and creating normalized 2D maps of the spatial distribution of inputs  
132 (Figure 2C). Individual maps were then aligned (either to the pia or soma) and averaged. To quantify the  
133 spatial location of inputs, we projected the average 2D maps in directions parallel (Figure 2C) or  
134 perpendicular to the apical dendrite (Figure 2D). Furthermore, we defined the spatial distribution of the  
135 three main dendritic compartments based on 11 morphologically reconstructed Colgalt2-Cre neurons  
136 (Figure S4). Basal dendrites were defined as those originating at the soma, oblique dendrites as those  
137 originating from the apical trunk before the main bifurcation (including the apical trunk itself), and apical  
138 tuft dendrites as those originating after the bifurcation. As all three dendritic compartments have similar  
139 spine densities (Romand et al 2011), the horizontal projection of the average morphology was used to  
140 separate the contribution of each dendritic domain to the total synaptic input (Figure 2D).

141 One potential concern when recording distal synaptic currents from a somatic electrode is the effect of  
142 attenuation on detectability of currents. In neurons with weaker overall input, this might result in distal  
143 currents becoming too small to detect, thus biasing the input map towards the soma. We tested this by  
144 examining the correlation between the location of synaptic input and the total synaptic charge evoked by

145 full-field stimulation (Figure S5). No correlation was found for any of the recorded areas, suggesting no  
146 detection bias for distal inputs.

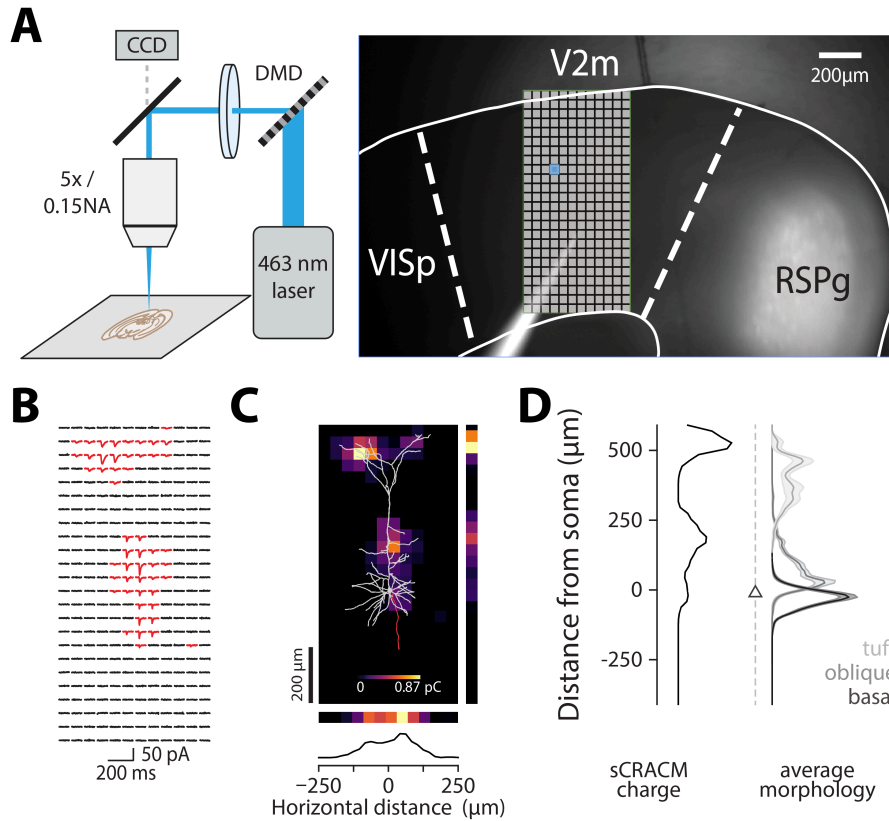

147

148 **Figure 2. Using sCRACM to map subcellular connectivity.** **A.** Experimental setup and micrograph showing a brain  
149 slice with Chronos expression in RSPg and recording pipette in V2M. The stimulation grid is overlaid, and an example  
150 spot is highlighted in blue. **B.** sCRACM recording of excitatory synaptic currents (red > 7 x baseline S.D.) from an  
151 example neuron. **C.** Charge heatmap corresponding to recording in B with the morphology of the recorded neuron  
152 overlaid. **D.** Normalized vertical profile of the input map in C. Right: average morphology profile used for dendritic  
153 domain deconvolution.

### 154 *Primary visual cortex*

155 We first recorded optically evoked synaptic responses arising from VISp axons ( $n = 9$  cells from 6  
156 animals, average soma depth  $507 \pm 22 \mu\text{m}$ ; Figure 3A). The apical tuft received 42% of the input, with a  
157 peak input located  $188 \mu\text{m}$  from the pia (Supplementary table 2). The remaining input was spread  
158 between the oblique compartment, receiving 33%, and basal dendrites, receiving 26% of the total input.  
159 More of the recorded neurons had the peak input in the apical compartment ( $n = 5 / 9$ ) while 4 cells  
160 lacked apical input (Figure S6). The horizontal input distribution showed a slight medial skew (towards  
161 RSPg), most prominent in the oblique ( $63 \mu\text{m}$ ) and basal compartments ( $42 \mu\text{m}$ ; Figure S6B). The total  
162 synaptic charge measured via the somatic recording following full-field stimulation was  $0.93 \pm 0.11 \text{ pC}$   
163 (Figure 3A). VISp thus provides moderate direct input to tL5 neurons in V2M, primarily targeting the

164 proximal part of the apical tuft (0.39 pC) with smaller input arriving to the oblique (0.30 pC) and basal  
 165 (0.24 pC) compartments.

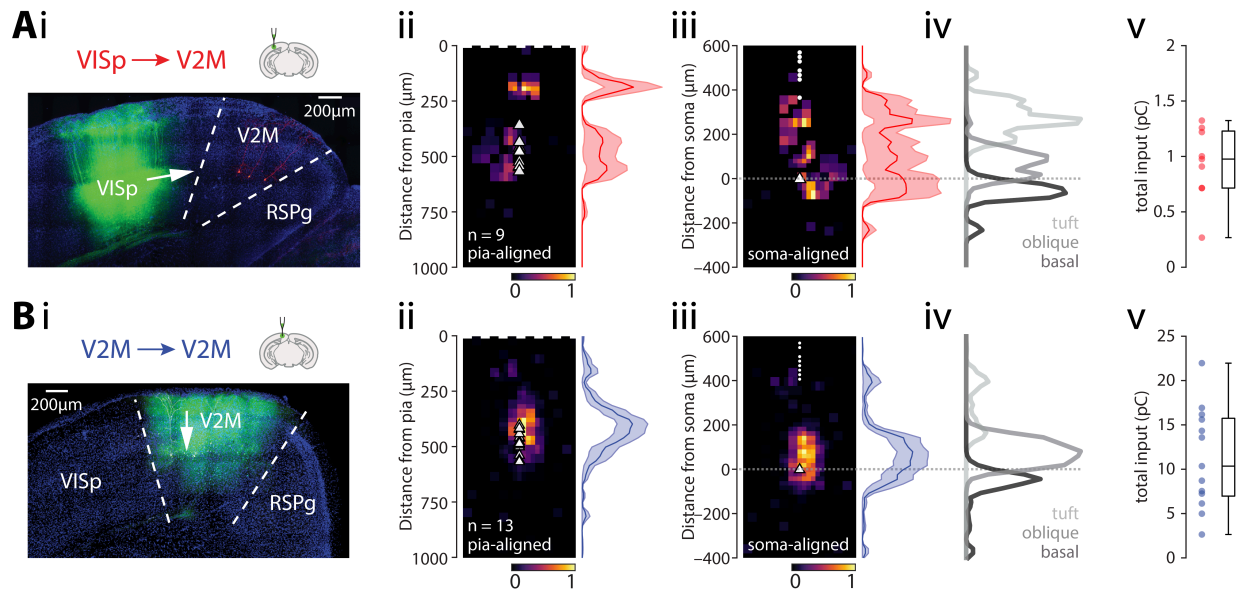

166

167 **Figure 3. Subcellular connectivity maps of FF input areas.** **A. i:** confocal image of a representative brain slice  
 168 (blue = DAPI) showing the injection site in VISp (green) and recorded neurons in V2M (red). **ii:** pia-aligned average  
 169 sCRACM heatmap for VISp inputs. Triangles represent soma locations. The vertical profile indicates the normalized  
 170 average and SEM of the input distributions across all recorded neurons. **iii:** Same as in ii but aligned on the soma  
 171 location. Dots indicate pia locations. **iv:** Normalized input magnitude deconvolved with the average morphology.  
 172 Dotted line indicates soma location. **v:** Box plot showing total input charge recorded during full-field stimulation. **B.**  
 173 Same as in A but for Cre-off Chronos injections into V2M.

### 174 *Local input from V2M*

175 To estimate the distribution of local input we used a Cre-off viral strategy, limiting Chronos expression to  
 176 non-Colgalt2-Cre neurons (n = 13 cells from 4 animals, average soma depth  $498 \pm 15 \mu\text{m}$ ; Figure 3B).  
 177 When testing this strategy using the much denser Rbp4-Cre line, we found that only a very small  
 178 proportion of Cre-positive cells expressed Chronos (3%, Figure S7). The peak input was located close to  
 179 the soma, at  $396 \mu\text{m}$  from the pia. The oblique compartment received the majority (62%) of this input, with  
 180 the basal dendrites and apical tuft receiving 24% and 14%, respectively, of the total input (Supplementary  
 181 table 2). For the majority of recorded neurons, the peak input occurred perisomatically (n = 12 / 13; Figure  
 182 S6C). The horizontal input distribution showed slight medial bias ( $-21 \mu\text{m}$  for all peaks; Figure S6D). The  
 183 total synaptic charge triggered by full-field stimulation was  $11.24 \pm 1.56 \text{ pC}$  (Figure 3B). Local neurons  
 184 thus provide large direct input to tL5 neurons in V2M, primarily targeting the oblique (6.96 pC)  
 185 compartment, with smaller input arriving to the basal (2.68 pC) and tuft (1.6 pC) compartments.

### 186 *Granular retrosplenial area*

187 Next, we recorded optically evoked synaptic responses arising from RSPg axons ( $n = 20$  cells from 9  
188 animals, average soma depth  $503 \pm 15 \mu\text{m}$ ; Figure 4A). The overall input displayed a bimodal distribution  
189 peaking at 125 and 500  $\mu\text{m}$  from the pia. The apical tuft received 30% of the input, with the oblique  
190 compartment receiving 40% and basal dendrites 30% of the total input (Supplementary table 2). For the  
191 majority of recorded neurons, the peak input targeted the perisomatic dendrites ( $n = 18 / 20$ ; Figure S8A).  
192 The horizontal input distribution showed slight medial bias (Figure S8B). Total synaptic charge triggered  
193 by full-field stimulation was  $3.40 \pm 0.51 \text{ pC}$  (Figure 4A). RSPg thus provides a relatively moderate direct  
194 input to tL5 neurons in V2M, targeting the oblique (1.36 pC), basal (1.04 pC) and apical tuft (1.01 pC)  
195 compartments to similar extent.

### 196 *Anterior cingulate area*

197 Next, we recorded optically evoked synaptic responses arising from ACA axons ( $n = 23$  cells from 5  
198 animals, average soma depth  $464 \pm 9 \mu\text{m}$ ; Figure 4B). The overall input was bimodal, peaking at 83  $\mu\text{m}$   
199 and 438  $\mu\text{m}$  from the pia. The apical tuft received 25% of the input, with the oblique compartment  
200 receiving 45% and basal dendrites 30% of the total input (Supplementary table 2). The majority of  
201 recorded neurons had the peak input located perisomatically ( $n = 22 / 23$ ; Figure S8C). The horizontal  
202 input distribution showed no medio-lateral bias (Figure S8D). The total synaptic charge triggered by full-  
203 field stimulation was  $9.46 \pm 1.32 \text{ pC}$  (Figure 4B). ACA thus provides a large direct input to tL5 neurons in  
204 V2M, primarily targeting the oblique (4.22 pC) compartment with smaller input arriving to the basal (2.83  
205 pC) and most distal part of the apical tuft (2.41 pC).

### 206 *Orbitofrontal cortex*

207 Optically evoked synaptic responses arising from ORB axons ( $n = 11$  cells from 3 animals, average soma  
208 depth  $521 \pm 19 \mu\text{m}$ ; Figure 4C) showed a strong perisomatic bias, with a peak at 417  $\mu\text{m}$  from the pia.  
209 The apical tuft received only 9% of all input, with the oblique compartment receiving 57% and basal  
210 dendrites 35% of the total input (Supplementary table 2). This distribution was also highly homogeneous  
211 across neurons, with almost all recorded neurons having their peak input in the perisomatic region ( $n =$   
212  $11/11$ ; Figure S8E). The horizontal input distribution showed no lateral bias (Figure S8F). The total  
213 synaptic charge triggered by full-field stimulation was  $7.16 \pm 1.43 \text{ pC}$  (Figure 4C). ORB thus provides a  
214 large direct input to tL5 neurons in V2M, primarily targeting the oblique (4.05 pC) and basal (2.47 pC)  
215 compartments, with slight input arriving to the proximal part of the apical tuft (0.63 pC).



216

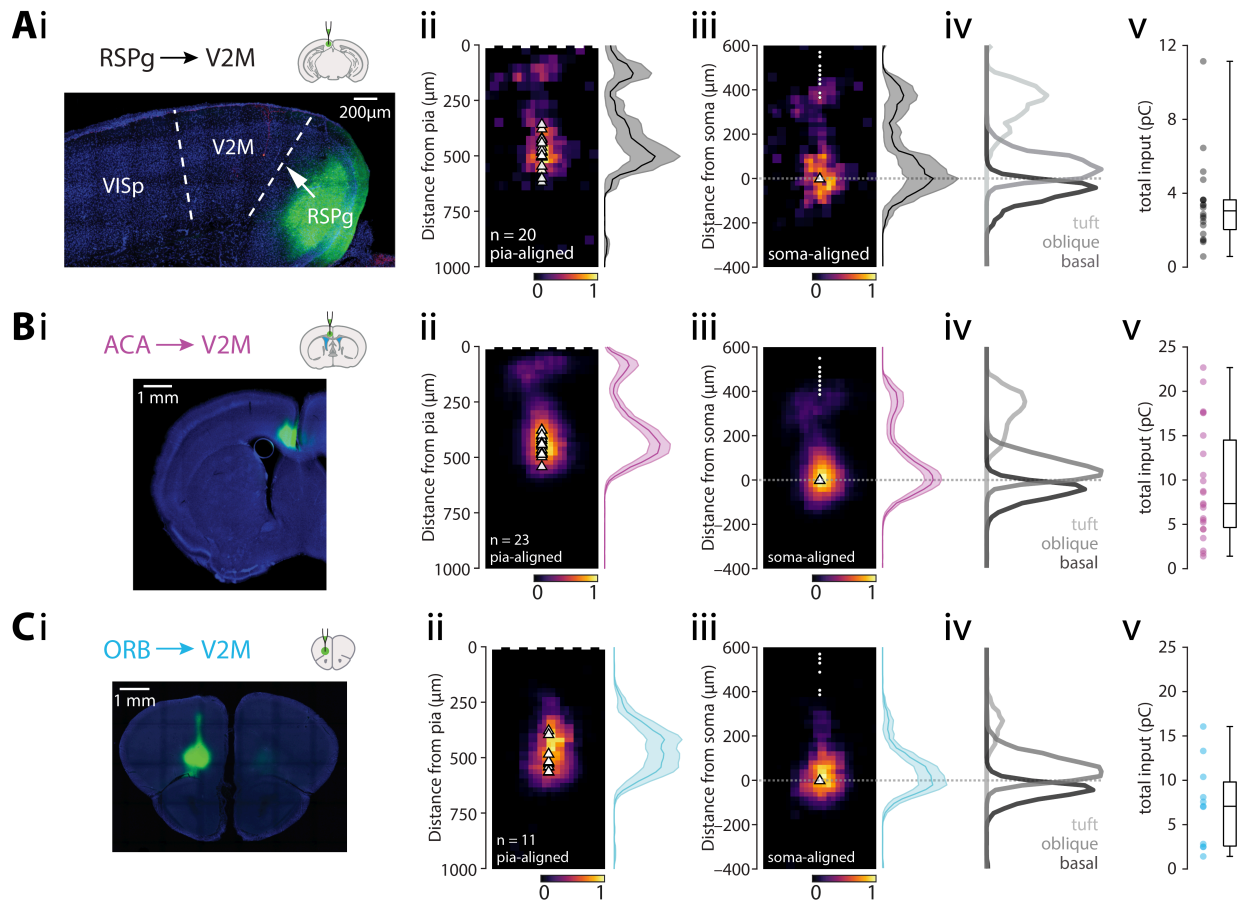

217

218 **Figure 4. Subcellular connectivity maps of cortical FB areas.** **A. i:** confocal image of a representative brain slice  
 219 (blue = DAPI) showing the injection site in RSPg (green). **ii:** pia-aligned average sCRACM heatmap for RSPg inputs.  
 220 Triangles represent soma locations. The vertical profile indicates the normalized average and SEM of the input  
 221 distributions across all recorded neurons. **iii:** Same as in **ii** but aligned on the soma location. Dots indicate pia  
 222 locations. **iv:** Normalized input magnitude deconvolved with the average morphology. Dotted line indicates soma  
 223 location. **v:** Box plot showing total input charge recorded during full-field stimulation. **B.** Same as in **A** but for Chronos  
 224 injections into ACA. **C.** Same as in **A** but for Chronos injections into ORB.

## 225 *Anterior thalamic nuclei*

226 Next, we recorded optically evoked synaptic responses from thalamic axons, starting with the ATN (n = 8  
 227 cells from 3 animals, average soma depth  $435 \pm 15 \mu\text{m}$ ; Figure 5A). This input had peaks at both 104 μm  
 228 and 333 μm from the pia, with the apical tuft receiving the majority (75%) of the input, while the oblique  
 229 compartment received 17% and basal dendrites a mere 8% of the total input (Supplementary table 2).  
 230 The majority of recorded neurons had the peak input in the tuft compartment (n = 6 / 8) and while all cells  
 231 had some tuft input, in 2/8 cells the input peak was located perisomatically (Figure S9A). The horizontal  
 232 input distribution showed a medial bias (Figure S9B). The total synaptic charge triggered by full-field

233 stimulation was  $2.48 \pm 0.54$  pC (Figure 5A). ATN thus provides a moderate direct input to ttL5 neurons in  
 234 V2M, primarily targeting the more distal part of the apical tuft (1.86 pC) while the oblique (0.42 pC) and  
 235 the basal (0.21 pC) compartment received less input.

236

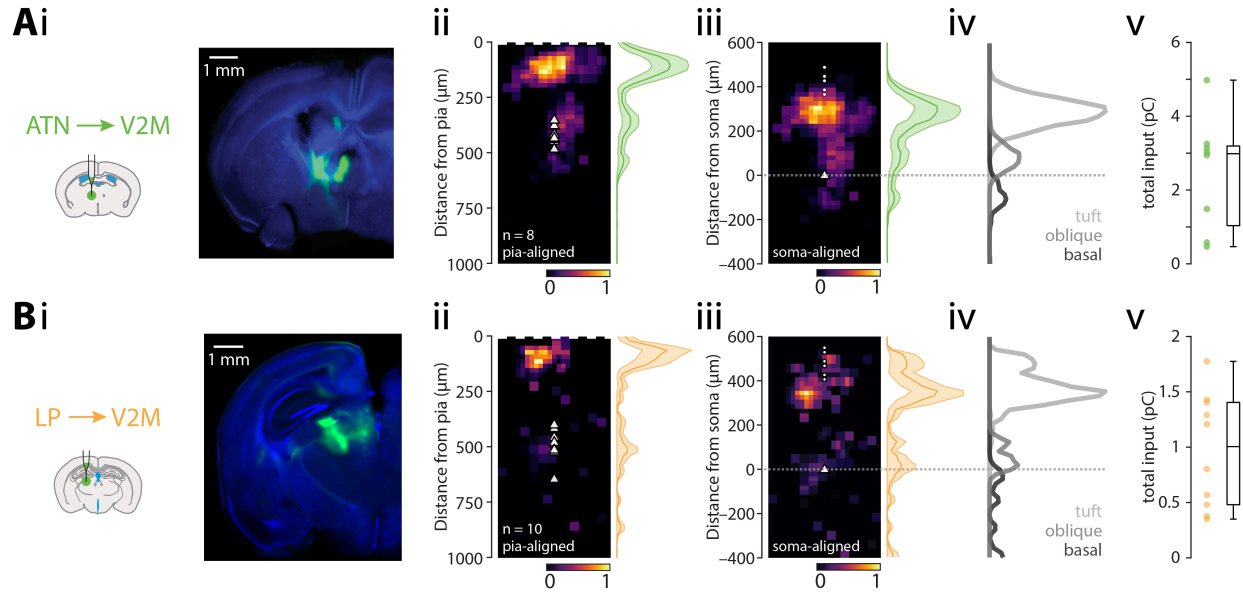

237

238 **Figure 5. Subcellular connectivity maps of thalamic input areas. A. i:** confocal image of a representative brain  
 239 slice (blue = DAPI) showing the injection site in ATN (green). **ii:** pia-aligned average sCRACM heatmap for ATN  
 240 inputs. Triangles represent soma locations. The vertical profile indicates the normalized average and SEM of the  
 241 input distributions across all recorded neurons. **iii:** Same as in **ii** but aligned on the soma location. Dots indicate pia  
 242 locations. **iv:** Normalized input magnitude deconvolved with the average morphology. Dotted line indicates soma  
 243 location. **v:** Box plot showing total input charge recorded during full-field stimulation. **B.** Same as in A but for Chronos  
 244 injections in LP.

## 245 *Lateral posterior nucleus of the thalamus*

246 Lastly, we recorded optically evoked synaptic responses arising from LP axons (n = 10 cells from 4  
 247 animals, average soma depth  $500 \pm 23$  μm; Figure 5B). Due to excessive retrograde labelling resulting in  
 248 direct photocurrent in the recorded V2M cells, a 1:10 dilution of virus was used for these injections and  
 249 the absolute value of the evoked input is thus likely an underestimate. As with ATN axons, the LP input  
 250 was strongly biased towards the most superficial part of the cortex and peaked at 63 μm from the pia. The  
 251 apical tuft received the vast majority (75%) of the input, with the oblique compartment receiving 15% and  
 252 basal dendrites 10 % of the total input (Supplementary table 2). Most recorded neurons had the peak  
 253 input in the tuft compartment (n = 9/10; Figure S9C). The horizontal input distribution showed lateral bias  
 254 (Figure S9D). The total synaptic charge triggered by full-field stimulation was  $0.97 \pm 0.16$  pC (Figure 5B).  
 255 LP thus provides modest direct input to ttL5 neurons in V2M, primarily targeting the most distal part of the

256 apical tuft (0.72 pC) compartment with smaller input arriving to the oblique (0.14 pC) and the basal (0.10  
257 pC) compartments.

## 258 Comparison of anatomical and functional connectivity maps

259 Having determined the spatial distribution of synapses for the main input areas, we next sought to directly  
260 compare this to what would be predicted from axo-dendritic overlap (i.e. from Peters' rule). To determine  
261 axonal projection patterns from input areas to V2M, we have imaged the Chronos-eGFP labelled axons in  
262 a subset of the brain slices used for the sCRACM experiments using confocal microscopy.

263

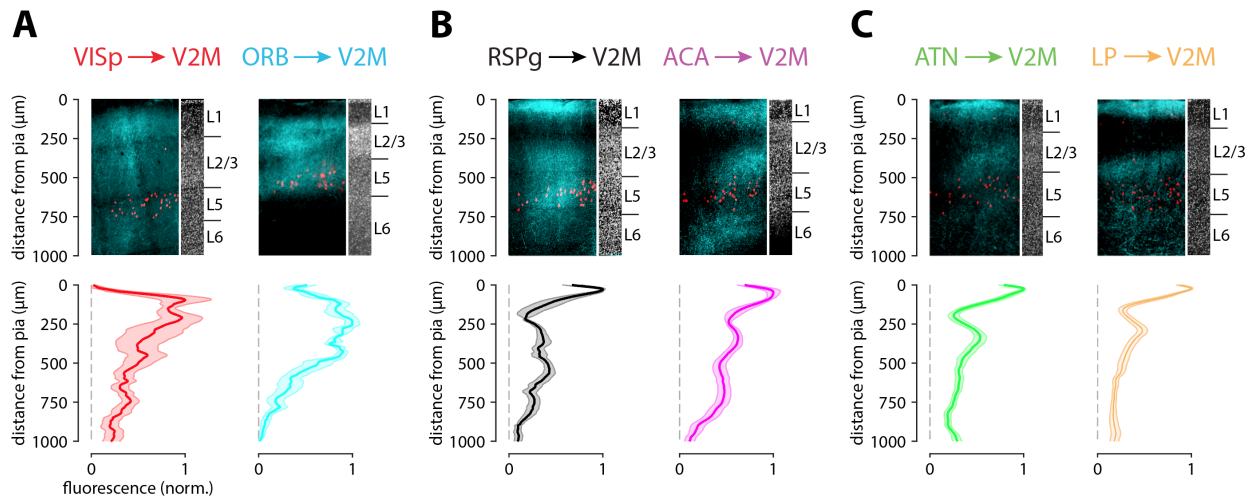

264

265 **Figure 6. Axonal projection densities from different input areas. A-C.** Top: example confocal images from V2M  
266 showing axonal projections from six input areas (cyan) and Colgalt2-Cre cell bodies (red). The corresponding DAPI  
267 staining shows variation in laminar depth. Bottom: average projection density profiles across the cortical depth  
268 averaged across 3-5 injections.

269 The spatial distribution of axons followed three basic patterns. Axons from VISp and ORB were densest  
270 in layer (L) 2/3 and L5 while little projection was apparent in L1, reminiscent of the classical FF projection  
271 pattern (Figure 6A). In contrast, axons from RSPg and ACA showed an FB-like pattern with dense  
272 labelling in the middle part of L1 followed by sparse labelling in L2 and diffuse axons in layers 3, 5 and 6  
273 (Figure 6B). The final group, which consists of the thalamic projections from LP and ATN, showed the  
274 classical FB pattern strongly innervating the external part of L1, with a secondary peak in L3, but little or  
275 no projections in layers 2, 5 and 6 (Figure 6C).

276 To accurately estimate morphological overlap between axons and dendrites, we multiplied the axonal  
277 projection maps with the average dendritic morphology, resulting in the predicted input distribution one  
278 would expect to see based on Peters' rule. When overlaying this with the pia-aligned vertical sCRACM  
279 maps, the alignments between functional synapses and the axo-dendritic maps were diverse (Figure 7A).

280 For some regions, like ORB perisomatic and LP tuft inputs, a clear correspondence could be seen  
281 between predicted and measured input distributions. A lesser degree of overlap can be seen in the VISp  
282 perisomatic or ACA tuft inputs. For other inputs, however, strong functional input could be detected where  
283 there is little overlap between dendrites and axons, such as at VISp tuft inputs. This stood in stark  
284 contrast to the ORB projection, for which the opposite was true, and apical regions of dense  
285 morphological overlap of axons and dendrites resulted in no functional input.

286 Next we examined the correspondence between the anatomical input connectivity obtained from rabies  
287 tracing and the functional connectivity measured by total synaptic input. The number of rabies-labelled  
288 input neurons showed a strong contribution from RSPg and V2M, and modest input cell numbers for the  
289 more distal cortical regions (e.g. ACA, ORB). The total synaptic input, however, shows no correlation with  
290 these numbers ( $p = 0.8$ ,  $r = -0.14$ , Spearman correlation, Figure 7B), with modest synaptic input from  
291 RSPg and most input arriving from V2M, ACA and ORB. Taken together, these results show clear  
292 specificity of dendritic targeting by brain-wide connections, with only a loose adherence to Peters' rule for  
293 most inputs as well as large differences between anatomical and functional connectivity measured by  
294 rabies tracing and optogenetic stimulation, respectively.

295

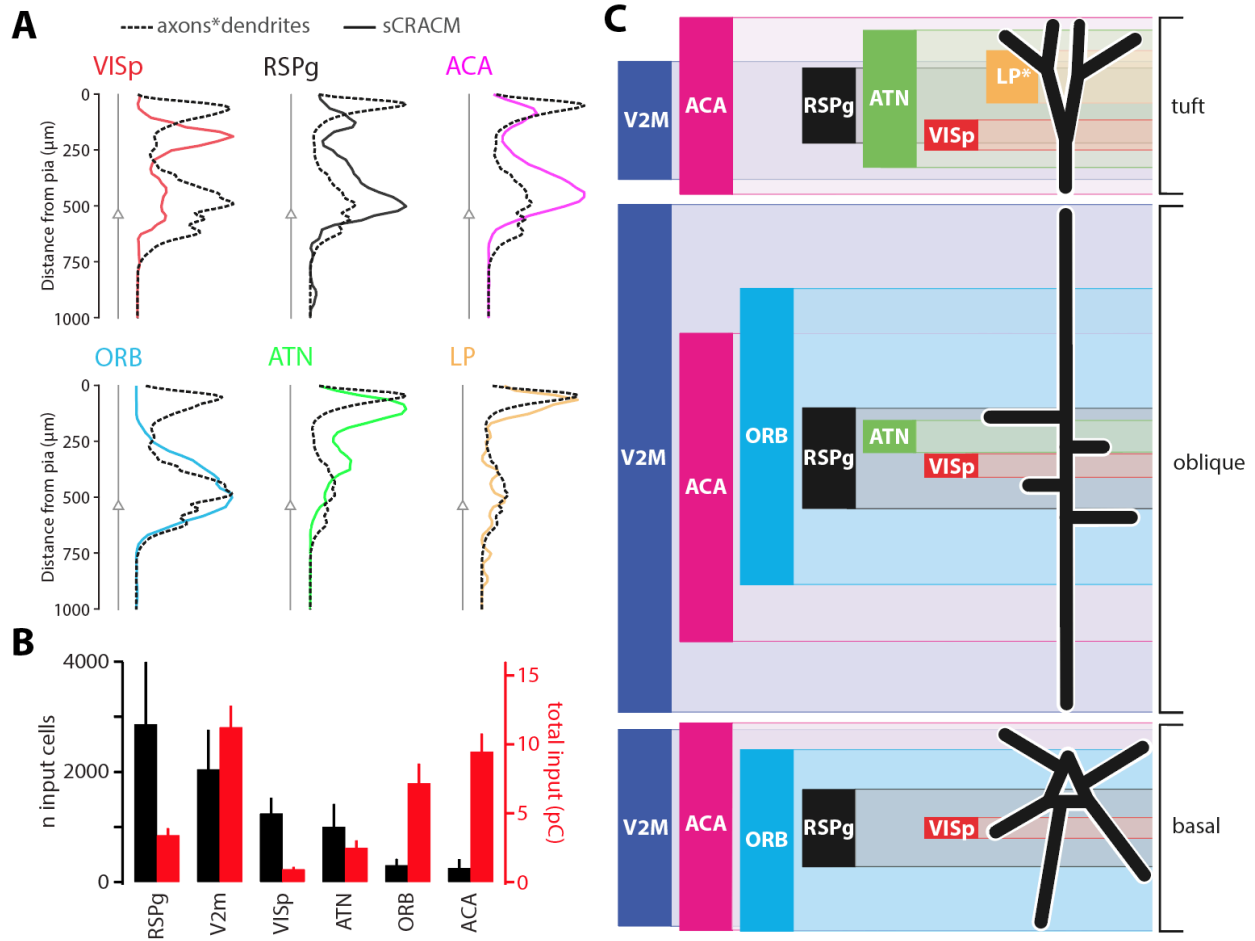

296

297 **Figure 7. Comparison of different input maps.** **A.** Axonal density distributions multiplied with dendritic morphology  
 298 (dotted black lines) overlaid with pia-aligned synaptic input distributions (coloured lines). Six input areas.   
 299 Triangles represent soma location in average morphology. **B.** Number of input cells across 6 areas established by  
 300 rabies tracing (black) and total input charge recorded during full-field optogenetic stimulation (red). **C.** Schematic of  
 301 excitatory synaptic input map to ttL5 pyramidal neurons. The height of bars represents input strength, while the centre  
 302 of each bar is aligned to the peak of the sCRACM map. The tuft input map was generated from pia aligned maps  
 303 while oblique and basal maps from soma aligned maps. NB: LP input magnitude (\*) is likely underestimated due to  
 304 the lower virus titer used.

305

## 306 Discussion

307 Using an array of techniques for long-range circuit dissection, we have comprehensively mapped the  
308 location and dendritic targets of inputs to tL5 neurons in the medial secondary visual cortex in mice. This  
309 allowed us to determine the dendritic targets of FF and FB connections and to make a direct assessment  
310 of Peters' rule for brain-wide connections.

311 The whole-brain input map generated via rabies tracing was qualitatively similar to previous results from  
312 the primary visual cortex (Kim et al 2015). Axonal projections from the rabies-identified input regions  
313 broadly followed the expected pattern, with FB projections being biased toward L1 and FF areas toward  
314 the deeper layers (D'Souza et al 2020, Harris et al 2019, Rockland & Pandya 1979). Accordingly, L1 was  
315 densely innervated by higher-order cortical areas like RSPg and ACA as well as the secondary thalamic  
316 nuclei (LP, ATN). Interestingly, ORB, a higher-order cortical region, displayed a projection pattern  
317 associated with FF areas. Additionally, the majority of ORB projection neurons were found in L2/3,  
318 another feature of FF connectivity. ORB thus seems to be an exception in terms of FB axonal projections.

319 Compared to the axonal projection patterns, synaptic input maps showed a remarkable degree of  
320 heterogeneity. Morphological averaging was necessary as the sCRACM recordings in our dataset did not  
321 have paired reconstructions for every cell. While it is possible that comparing the individual axon,  
322 dendrite, and synaptic profiles on a single-cell basis would have given slightly more accurate results, the  
323 overall pattern of functional input from each input region was mostly consistent across cells. Morphologies  
324 of tL5 neurons are likewise highly stereotypical. Furthermore, the axon projection patterns used for  
325 evaluating Peters' rule were measured from a subset of the same slices used for the sCRACM  
326 recordings, further supporting the direct comparison of the predicted input maps with those recorded  
327 functionally. The discrepancy resulting from averaging is thus likely to be low. Indeed, any smoothing  
328 resulting from averaging of morphologies, axonal projections or sCRACM maps would only increase  
329 overlap, and thus bias the results in favor of adhering to Peters' rule. In contrast to this, several  
330 connections showed only weak correspondence between predicted and observed input maps. The  
331 connection from VISp, which is FF by definition and as such is assumed to primarily target perisomatic  
332 dendrites (Larkum 2013), was instead biased towards the apical tuft. Conversely, while the axons from  
333 ORB had a FF-like projection pattern, they synapsed almost exclusively with basal and oblique dendrites.  
334 Other recorded areas (e.g., RSPg, ACA, ATN) showed some degree of conformity to Peters' rule, yet still  
335 with significant differences in the proportion of synapses generated in the different regions of high axonal  
336 projections. The only area where the correspondence was remarkable and Peter's rule held fully was LP.

337 Comparing anatomical connectivity obtained by rabies tracing to functional connectivity obtained by full-  
338 field optogenetic stimulation of axons revealed large and unexpected differences. When evaluating this  
339 finding, it is important to consider a few technical caveats which might bias this comparison. First, while  
340 we have not found false-positive areas (i.e., every area revealed by rabies tracing and tested by sCRACM

341 provided input), there is considerable debate regarding the quantitative accuracy of rabies tracing  
342 (Rogers & Beier 2021). Second, the magnitude of optogenetically evoked input depends on the number of  
343 presynaptic cells covered by viral injection. To facilitate comparison with the rabies labelling, we aimed to  
344 maximise coverage of each area by making several injections targeted to the locations with the highest  
345 density in the rabies data. It is unlikely that these technical caveats could alone account for the  
346 remarkable discrepancy between anatomical and functional input magnitudes. There are several other  
347 possible explanations for this difference. First, there may be differing convergence of connectivity  
348 between input areas. For example, low convergence in inputs with strong rabies labelling, with a unique  
349 mapping of selected pre- and postsynaptic cells, could result in relatively weaker sCRACM input (like  
350 VISp and RSPg). Meanwhile, strong synaptic currents relative to small rabies-labelled populations (like  
351 ORB and ACA) may be explained by higher convergence. Such connections might be less discerning of  
352 their targets in order to convey more general contextual or state-specific information. Second, there may  
353 be a difference in the strength of individual synapses not reflected in rabies efficiency, with sparsely  
354 labelled input areas like ORB having relatively strong synapses, while rabies-dense areas like RSPg may  
355 send a large number of weaker synapses. A third contributing factor could be the recently reported  
356 activity-dependence of rabies transmission (Beier et al 2017). The apparent sparsity of some input areas  
357 (like ORB and ACA) could thus arise from having very low activity. Conversely, to result in extensive  
358 rabies labelling, VISp and RSPg should provide high activity input.

359 We used a novel approach to allocate sCRACM input to specific dendritic compartments by deconvolving  
360 the synaptic input maps using morphological ttL5 reconstructions in which we manually labelled tuft,  
361 oblique, and basal compartments. Our results provide a complex picture regarding the possible  
362 interaction of FF and FB inputs (Figure 7C). Functionally, V2M has been linked to visual motion  
363 processing (Sun et al 2009) and is thought to take part in navigation and spatial processing as part of the  
364 dorsal stream (Glickfeld & Olsen 2017). Thalamic FB input, which targets almost exclusively the apical  
365 tuft, arrives from multiple higher-order nuclei. Parts of ATN receive strong vestibular input (Rancz et al  
366 2015) and, together with RSP form a central part of the head-direction system (Taube 2007, Velez-Fort et  
367 al 2018). It is thus likely that spatial and multisensory contextual information carried by LP inputs (Roth et  
368 al 2016) interacts with FF visual input in the tuft compartment. However, the role of tuft integration is likely  
369 to differ from primary sensory cortices, considering that ttL5 neurons in the secondary visual cortex have  
370 substantially different integrative properties (Galloni et al 2020). Contrary to thalamic input, cortical FB  
371 inputs target all three dendritic domains. Perhaps surprisingly, the strongest of these are ORB and ACA,  
372 which can interact with the local FF input at the level of oblique and basal dendrites. Frontal cortices in  
373 general are involved in decision making and executive control of behavior (Hamilton & Brigman 2015),  
374 and ORB in particular has been shown to encode spatial goals (Feierstein et al 2006). ACA, meanwhile,  
375 can directly regulate visually evoked responses and sensory discrimination in the primary visual cortex  
376 (Zhang et al 2014), and contributes to learning to predict sensory input to primary visual cortex (Fiser et al  
377 2016). Their precise roles in the functioning of V2M, however, remains unknown. The strong input

378 received by oblique dendrites is particularly important, as this compartment was shown to strongly affect  
379 L5 excitability (Schaefer et al 2003) and can gate information flow from the apical dendrites (Jarsky et al  
380 2005). While FB inputs targeting the apical tuft have been suggested to act as a general gain control for  
381 ttL5 neurons, it is thus possible that ORB and ACA perform a similar gating function, but perhaps with  
382 more specificity regarding input identity or dendritic branches. Indeed, their particularly strong targeting of  
383 oblique dendrites might allow both fine-level control of plasticity for FF synapses at these dendrites, while  
384 simultaneously allowing them to exert gating control over input from both the thalamic nuclei and VISp,  
385 which strongly project to the tuft.

386 In general, our results show that while the classification of areas as FF or FB can be based on axonal  
387 projections (albeit with exceptions, such as ORB), macroscopic projectomes do not predict cell-type level  
388 input location, and individual connections do not follow clear rules associated with their position above or  
389 below the target area in a cortical hierarchy. Similarly, while rabies tracing from a population of starter  
390 cells is an effective tool to study the general wiring diagram, the proportion of input neurons thus  
391 estimated is likely to give a poor estimation of functional input strength. Finally, the location and possible  
392 interactions between FF and the broad range of FB inputs as well as their specific information content  
393 suggests that ttL5 neurons may be adopting a multitude of integrative strategies that are more complex  
394 than those previously suggested.



## 395 Materials and Methods

### 396 *Animals*

397 All animal experiments were prospectively approved by the local ethics panel of the Francis Crick Institute  
398 (previously National Institute for Medical Research) and the UK Home Office under the Animals (Scientific  
399 Procedures) Act 1986 (PPL: 70/8935). All surgery was performed under isoflurane anesthesia, and every  
400 effort was made to minimize suffering. Transgenic mice were used: Tg(Colgal2-Cre)NF107Gsat  
401 (RRID:MMRRC\_036504-UCD, also known as Glt25d2-Cre) were crossed with the Ai14 reported line  
402 expressing tdTomato (RRID:IMSR\_JAX:007908). Additionally, Tg(Rbp4-Cre)KL100Gsat/Mmucd  
403 (RRID:MMRRC\_031125-UCD) mice were used to establish the efficacy of the cre-off approach. As only  
404 male mice are transgenic in the Colgal2-Cre line, all experiments were done on male animals. Animals  
405 were housed in individually ventilated cages under a 12 hr light/dark cycle.

### 406 *Viruses*

407 EnvA-CVS-N2c<sup>ΔG</sup>-mCherry rabies virus, and adeno associated viruses expressing TVA and EGFP  
408 (AAV8-EF1a-flex-GT), N2c glycoprotein (AAV1-Syn-flex-H2B-N2CG), or Cre-OFF Chronos-GFP (AAV1-  
409 EF1-CreOff-Chronos-GFP) were a generous gift of Molly Strom and Troy Margrie. Chronos-GFP (also  
410 called ShChR) expressing adeno associated virus (rAAV1-Syn-Chronos-GFP) was obtained from UNC  
411 Vector Core.

### 412 *Surgical procedures*

413 Surgeries were performed on mice aged 3–8 weeks using aseptic technique under isoflurane (2–4%)  
414 anesthesia and analgesia (meloxicam 2 mg/kg and buprenorphine 0.1 mg/kg). The animals were head-  
415 fixed in a stereotaxic frame and a small hole (0.5–0.7 mm) was drilled in the skull above the injection site.  
416 Virus was loaded into a glass microinjection pipette (pulled to a tip diameter of around 20 μm) and  
417 pressure injected into the target region at a rate of 0.4 nl/s using a Nanoject III delivery system  
418 (Drummond Scientific). To reduce backflow, the pipette was left in the brain for approximately 5 min after  
419 completion of each injection.

420 For rabies virus tracing experiments, a 1:2 mixture of TVA and N2c glycoprotein expressing cre-  
421 dependent AAVs (10-20 nL) was injected at stereotaxic brain coordinates ( $\lambda$  - 0.8 mm, ML 1.6 mm, DV  
422 0.6 mm). Rabies virus (50-100 nL) was injected 5-7 days later at the same site. Ten to twelve days later,  
423 animals were transcardially perfused under terminal anesthesia with cold phosphate-buffer (PB, 0.1 M)  
424 followed by 4% paraformaldehyde (PFA) in PB (0.1 M).

425 For the sCRACM experiments, Chronos-GFP expressing AAV was injected into one of the identified  
426 presynaptic regions. The virus was allowed to express for at least 3 weeks before acute brain slice

427 preparation. The range of stereotaxic coordinates for each region are listed in Supplementary table 3. The  
428 injected virus was Chronos-GFP for every region except V2M, where Cre-OFF Chronos-GFP was instead  
429 used to avoid expression in the recorded Colgalt2-Cre neurons. For some of the injections in LP, the  
430 Chronos-GFP virus was diluted by 10-fold in sterile cortex buffer before injection.

#### 431 *Data acquisition and analysis for rabies tracing experiments*

432 Brain samples were embedded in 4-5% agarose (Sigma-Aldrich: 9012-36-6) in 0.1M PB and imaged  
433 using serial two-photon tomography (Han et al 2018, Osten & Margrie 2013, Ragan et al 2012). Eight  
434 optical sections were imaged every 5  $\mu\text{m}$  with 1.2  $\mu\text{m}$  x 1.2  $\mu\text{m}$  lateral resolution, after which a 40 $\mu\text{m}$   
435 physical section was removed. Excitation was provided by a pulsed femto-second laser at 800 nm  
436 wavelength (MaiTai eHP, Spectraphysics). Images were acquired through a 16X, 0.8 NA objective (Nikon  
437 MRP07220) in three channels (green, red, blue) using photomultiplier tubes. Image tiles for each channel  
438 and optical plane were stitched together with an open-source software written in MATLAB  
439 (<https://github.com/SainsburyWellcomeCentre/StitchIt>). For cell detection, full resolution images were first  
440 filtered with a Gaussian blur (sigma = 1) using Fiji (ImageJ 1.52e) to reduce imaging noise. The open-  
441 source package “cellfinder” (Tyson et al 2020) was used for cell candidate detection then classification.  
442 Automated mouse atlas propagation (Niedworok et al 2016) was used for registration and segmentation  
443 on brain samples down-sampled to 10  $\mu\text{m}$  voxels (to match the resolution of the Allen CCFv3; (Wang et al  
444 2020a). Cell coordinates were similarly down-sampled to 10  $\mu\text{m}$  and the number of cells was counted for  
445 each segmented area. For cell density visualisation, cell coordinates were reverse-transformed onto the  
446 Allen CCFv3 space using the open source registration tool, Elastix (Klein et al 2010) and were projected  
447 onto a 2D matrix in 10  $\mu\text{m}$  / pixel resolution.

#### 448 *Acute slice preparation and electrophysiological recordings*

449 Adult mice were deeply anaesthetised with isoflurane and decapitated. The brain was rapidly removed  
450 and placed in oxygenated ice-cold slicing solution containing (in mM): 125 sucrose, 62.5 NaCl, 2.5 KCl,  
451 1.25  $\text{NaH}_2\text{PO}_4$ , 26  $\text{NaHCO}_3$ , 2  $\text{MgCl}_2$ , 1  $\text{CaCl}_2$ , 25 dextrose; osmolarity 340–350 mOsm. The cerebellum  
452 and frontal cortex were removed manually with a coronal cut using a single-edged razor blade and the  
453 rostral surface was affixed to a metal platform with cyanoacrylate glue. Coronal slices (300  $\mu\text{m}$  thick)  
454 between 2.6 and 3.5 mm posterior to bregma were prepared using a vibrating blade microtome (Leica  
455 VT1200S). Slices were kept submerged in artificial cerebrospinal fluid (ACSF, containing in mM: 125  
456 NaCl, 2.5 KCl, 1.25  $\text{NaH}_2\text{PO}_4$ , 26  $\text{NaHCO}_3$ , 1  $\text{MgCl}_2$ , 2  $\text{CaCl}_2$ , 25 dextrose; osmolarity 308–312 mOsm) at  
457 35°C for the first 30–60 min after slicing, then at room temperature (22°C). All solutions and chambers  
458 were continuously bubbled with carbogen (95%  $\text{O}_2$  / 5%  $\text{CO}_2$ ).

459 The topology of the cortical mantle in the region of V2m is curved and varies in thickness along the  
460 antero-posterior axis. In most coronal sections, the apical dendrites of L5 neurons were thus at a slight

461 angle relative to the slicing surface. This angle was minimized by slicing the brain with a slight backward  
462 angle relative to the coronal plane. Additionally, to avoid recording from neurons with cut apical dendrites,  
463 slices were placed such that the apical dendrites could be seen to descend at a shallow angle into the  
464 slice. Where possible, the fluorescently-labelled apical dendrites were also visually inspected along their  
465 full path from soma to pia. Furthermore, many neurons were successfully filled with biocytin during  
466 recording, making it possible to verify the integrity of the apical dendrite after the recordings. The  
467 observed neurons were all found to have an intact apical trunk with tuft dendrites extending to the pia.  
468 However, we can't exclude that a small fraction of finer dendrites (including both basal and apical tuft)  
469 extending towards the slice surface may have been partially cut in the process.

470 For recordings, individual slices were perfused in the recording chamber at a rate of approximately 6  
471 mL/min with ACSF at room temperature (22°C), continuously bubbled with carbogen. To prevent axonal  
472 spike propagation and enhance responses to optical stimulation, 1  $\mu$ M tetrodotoxin (TTX) and 100  $\mu$ M 4-  
473 aminopyridin (4-AP) were added to the recording ACSF. This ensured that any light-evoked responses  
474 were direct monosynaptic responses resulting from stimulation of Chronos-expressing axon terminals,  
475 rather than from passing axons terminating in unknown locations on the dendrites.

476 Filamented borosilicate thick-walled glass micropipettes were pulled and heat-polished using a two-stage  
477 horizontal puller (Zeitz DMZ Universal Electrode Puller) to obtain an electrode resistance of 3–6 M $\Omega$ . The  
478 glass electrodes were filled with internal solution optimized for voltage clamp recordings, containing (in  
479 mM): 120 CsMeSO<sub>3</sub> (CH<sub>3</sub>O<sub>3</sub>SCs), 3 CsCl, 10 HEPES, 1 EGTA, 4 Na<sub>2</sub>ATP, 0.3 NaGTP, 5 Na<sub>2</sub>-  
480 phosphocreatine (C<sub>4</sub>H<sub>8</sub>N<sub>3</sub>O<sub>5</sub>PNa<sub>2</sub>), 3.5 QX-314 chloride, 0.5 % (w/v) biocytin hydrochloride, 50  $\mu$ M Alexa  
481 Fluor 488 hydrazide; osmolarity 290–295 mOsm; pH adjusted to 7.3 with CsOH.

482 Visually guided whole-cell patch-clamp recordings from tdTomato-labelled Colgalt2-Cre neurons in V2M  
483 were performed using a Scientifica SliceScope Pro 3000 microscope equipped with a 40x/0.8 NA  
484 objective and an infrared (IR) Dodt Gradient Contrast system. The epifluorescence system used to  
485 visualize fluorescent neurons was a CoolLED pE-4000 illumination system with a 550 nm peak excitation  
486 wavelength. To avoid stimulating Chronos-expressing axons, epifluorescent illumination was kept to a  
487 minimum during selection of cells to record. Recordings were made with a Multiclamp 700B amplifier  
488 (Molecular Devices) in voltage-clamp configuration with a holding potential of -70 mV. Filtered signals  
489 (8kHz low-pass) were digitized at 20 kHz with a National Instruments DAQ board (PCIe-6323). Acquisition  
490 and stimulus protocols were generated in Igor Pro (Wavemetrics) with the NeuroMatic software package  
491 (Rothman & Silver 2018). Throughout each recording, series resistance compensation was applied and  
492 set to the highest value possible without inducing oscillations in the cell (typically between 40 and 75%).  
493 Recordings with series resistance larger than 40 M $\Omega$  were excluded.

#### 494 *Patterned optogenetic stimulation*

495 Optical stimulation was implemented using a digital micromirror device (DMD) with a 463 nm laser (laser-  
496 coupled Polygon 400, Mightex Systems). The stimulus consisted of a 1000 x 500  $\mu\text{m}$  grid divided into 24  
497 x 12 spots of light (41.7  $\mu\text{m}$  x 41.7  $\mu\text{m}$  square) delivered through a 5x/0.15 NA dry objective (Olympus  
498 MPlanFL N). The grid was approximately centered on the soma being recorded from, aligned to the pia  
499 orthogonal to the apical dendrite. For each individual spot, the laser power was measured at the  
500 specimen plane using a PM100D (Thorlabs) optical power meter equipped with a S121C sensor  
501 (Thorlabs). The laser output associated with each spot was adjusted to obtain a measured power of  
502 approximately 300  $\mu\text{W}$  (173  $\text{mW}/\text{mm}^2$ ).

503 Optical stimuli were delivered for 1 ms at 0.1 Hz in a pseudo-random sequence designed to maximise the  
504 distance between consecutive spots and the time between stimulation of neighbouring spots. Each  
505 recording trial consisted of a single repetition of all 288 stimuli followed by a full-field stimulus, in which all  
506 stimulation spots were illuminated simultaneously for 1 ms. For each cell, 5-20 trials were recorded, with  
507 30s pauses between trials, making the interval between consecutive stimulation of the same spot  
508 approximately 60s. Following each recording, an image was taken to record the location of the recorded  
509 cell (filled with Alexa Fluor 488) relative to the stimulation grid. This was used during analysis to align the  
510 recorded sCRACM heatmap with the location of the pia or soma.

#### 511 *Immunohistochemistry & morphological reconstructions*

512 After recording, slices were fixed overnight at 4°C in a 4% paraformaldehyde solution and were  
513 subsequently kept in PBS. Slices were stained with DAPI (5  $\mu\text{g}/\text{mL}$ ) for 10 min, mounted on glass slides  
514 and images were acquired with either a confocal microscope for high-resolution images (Leica SP5;  
515 objective: 20x/0.7NA or 10x/0.4NA; pinhole size: 1 airy unit) or a slide scanner for visualizing injection  
516 sites (Olympus VS120, objective: 4x/0.16NA). Image processing was done with the FIJI software package  
517 (Schindelin et al 2012). For the detailed morphological analysis, a subset of neurons, selected based on  
518 the quality and completeness of staining, was reconstructed in full through the LMtrace service of  
519 <https://ariadne.ai/lmtrace>.

#### 520 *Comparison of axonal projection patterns to VISam, VISpm and RSPagl*

521 We have obtained layer-wise axonal projection data from the 6 input areas (ACA n=33, ATN n=11, LP  
522 n=10, ORB n=11, RSPg n=17, VISp n=60) from the Allen Mouse Brain Connectivity database (© 2011  
523 Allen Institute for Brain Science. Allen Mouse Brain Connectivity Atlas. Available from:  
524 <https://connectivity.brain-map.org/>). Projection energy distributions were qualitatively similar across target  
525 areas (Figure S1). Quantitatively, the data followed the same layer-wise pattern across the three target  
526 areas ( $p > 0.05$ , 2-way ANOVA with Tukey's post hoc test) with the exception of ACA (RSPagl vs VISpm  
527  $p = 0.001$ ; VISam vs VISpm  $p = 0.016$ ). When only wild-type data was considered, no statistical

528 difference between target areas was detected ( $p > 0.05$ , 2-way ANOVA with Tukey's post hoc test;  $n =$   
529 ACA 5, ATN 4, LP 2, ORB 2, RSPg 2, VISp 21).

### 530 *Data analysis*

531 Analysis and data visualization were performed with custom macros and scripts written in Igor Pro and  
532 MATLAB (Mathworks). Unless otherwise specified, all reported data values refer to the mean  $\pm$  standard  
533 error (SEM). Recordings were not corrected for liquid junction potential.

534 Recordings were baselined in a 40 ms window before each stimulus and averaged across trials, and the  
535 peak and area of the evoked currents were measured in a 50 ms window after the stimulus. Stimulus  
536 spots for which the peak current was lower than seven times the standard deviation of the baseline noise  
537 were scored as zero.

538 For some of the injection sites, a degree of retrograde transport of the Chronos virus was noted in areas  
539 outside of the primary injection site, including in V2M. A few recorded Colgalt2-Cre neurons in V2M were  
540 thus found to be intrinsically expressing Chronos. This was easily detected in the recordings by an  
541 instantaneous inward current at the onset of laser stimulation, in contrast to the 4-5 ms delay between  
542 stimulus onset and sCRACM current observed normally. Any cells with no such delay were excluded from  
543 the analysis.

544 Because peak response amplitudes varied between cells and preparations, to obtain average input  
545 distributions from a presynaptic population, the heatmap for each cell was normalised to the peak EPSC  
546 value for that cell. Heatmaps were then aligned horizontally by soma location and then vertically by either  
547 soma or pia location before averaging each pixel across cells. For each cell, the soma could be localised  
548 to within one quadrant of a given stimulation spot. When averaging across cells, the effective sampling  
549 resolution (i.e. the pixel dimension) for the average sCRACM heatmaps and related horizontal and  
550 vertical projections were thus approximately 20.8  $\mu\text{m}$  (equal to half of the stimulus spot size, i.e. 1000/48  
551  $\mu\text{m}$ ). All values reported for the locations of sCRACM inputs from different presynaptic regions are in  
552 multiples of this number. Note, however, that the actual resolution with which synapses can be localised  
553 in the heatmaps is likely to be lower than this, as it is limited by both light scattering in the tissue and by  
554 the spread of voltage along stimulated axons, which is determined by the length constant of presynaptic  
555 axons. Previous studies have indicated that these factors limit the actual sCRACM resolution to  
556 approximately 60  $\mu\text{m}$  (Petreanu et al 2009).

557 To estimate the proportion of sCRACM input targeting different dendritic domains, the recorded input map  
558 for each cell was convolved with the average ttL5 morphology obtained from 11 reconstructed Colgalt2-  
559 Cre neurons in V2M. This was done by manually separating the apical tuft, oblique (including the apical  
560 trunk), and basal dendrites of the reconstructions in NeuroLucida 360 and quantifying the total dendritic  
561 length in 10  $\mu\text{m}$  thick sections perpendicular to the main axis of the apical dendrite. The resulting dendrite  
562 profiles were then aligned by the soma and averaged. Using this average morphology, at each distance

563 from the soma the proportion of dendrites belonging to each domain was calculated relative to the total  
564 dendritic length within that section. For each sCRACM recording, these proportions were calculated using  
565 an average morphology that was scaled to the soma-pia distance of the recorded cell. Each pixel of the  
566 heatmap for that cell was then multiplied by these dendritic proportions to obtain the proportion of evoked  
567 current assigned to each dendritic domain. Averaging the morphological reconstructions was necessary  
568 because only a small fraction of the recorded neurons was fully reconstructed, and we were thus unable  
569 to allocate sCRACM measures to specific dendritic domains on a cell-by-cell basis. Notably, because of  
570 variation in apical dendrite length between different tL5 neurons, the choice of soma alignment before  
571 averaging the morphologies resulted in the average morphology profile having a graded rather than sharp  
572 cutoff at the pia. The peak dendrite density near the pia thus appears smaller than it would in a pia-  
573 aligned average and is not related to any loss of dendrites in the reconstructed neurons. This choice was  
574 made because the distribution of tuft dendrites had relatively little overlap with the other dendritic  
575 domains, resulting in a more accurate assignment of sCRACM inputs to each domain. Had we aligned  
576 the morphologies by the pia instead, the resulting distributions for basal and oblique dendrites would have  
577 far greater overlap, resulting in lower accuracy in the dendritic domain classification.

578 The average morphology profile was also used to quantify the expected input profile on the basis of axon  
579 and dendrite densities at each distance from the pia. In this case, however, the same reconstructed  
580 morphologies were instead aligned by the apical tuft before averaging, in order to make the predicted  
581 input more comparable to the pia-aligned sCRACM maps. As with the sCRACM input, pia-alignment  
582 resulted in greater definition at the pia at the cost of reduced resolution near the average soma location.  
583 Following alignment, both the axon and dendrite distributions were normalized to the peak of each curve  
584 and multiplied, resulting in large values for expected input at locations containing both axons and  
585 dendrites.

586

## 587 Acknowledgments

588 We thank Troy Margrie and Molly Strom for viral constructs; Rob Campbell and Charlie Rousseau for help  
589 with data acquisition and analysis of rabies tracing experiments, and Joe Brock for help with illustrations.  
590 We are grateful to Florencia Iacaruso and Zoltán Kisvárdy for helpful comments on the manuscript.

591 **Competing interests:** The authors declare that no competing interests exist.

592

## 593 References

- 594 Anastasiades PG, Collins DP, Carter AG. 2021. Mediodorsal and Ventromedial Thalamus Engage  
595 Distinct L1 Circuits in the Prefrontal Cortex. *Neuron* 109: 314-30 e4
- 596 Aru J, Suzuki M, Larkum ME. 2020. Cellular Mechanisms of Conscious Processing. *Trends Cogn Sci* 24:  
597 814-25
- 598 Beier KT, Kim CK, Hoerbelt P, Hung LW, Heifets BD, et al. 2017. Rabies screen reveals GPe control of  
599 cocaine-triggered plasticity. *Nature* 549: 345-50
- 600 Briggman KL, Helmstaedter M, Denk W. 2011. Wiring specificity in the direction-selectivity circuit of the  
601 retina. *Nature* 471: 183-8
- 602 Collins DP, Anastasiades PG, Marlin JJ, Carter AG. 2018. Reciprocal Circuits Linking the Prefrontal  
603 Cortex with Dorsal and Ventral Thalamic Nuclei. *Neuron* 98: 366-79 e4
- 604 D'Souza RD, Meier AM, Bista P, Wang Q, Burkhalter A. 2016. Recruitment of inhibition and excitation  
605 across mouse visual cortex depends on the hierarchy of interconnecting areas. *Elife* 5
- 606 D'Souza RD, Wang Q, Ji W, Meier AM, Kennedy H, et al. 2020. Canonical and noncanonical features of  
607 the mouse visual cortical hierarchy. *biorxiv.org*
- 608 Feierstein CE, Quirk MC, Uchida N, Sosulski DL, Mainen ZF. 2006. Representation of spatial goals in rat  
609 orbitofrontal cortex. *Neuron* 51: 495-507
- 610 Felleman DJ, Van Essen DC. 1991. Distributed hierarchical processing in the primate cerebral cortex.  
611 *Cereb Cortex* 1: 1-47
- 612 Fino E, Yuste R. 2011. Dense inhibitory connectivity in neocortex. *Neuron* 69: 1188-203
- 613 Fiser A, Mahringer D, Oyibo HK, Petersen AV, Leinweber M, Keller GB. 2016. Experience-dependent  
614 spatial expectations in mouse visual cortex. *Nat Neurosci* 19: 1658-64
- 615 Franklin KBJ, Paxinos G. 2007. *Paxinos and Franklin's The mouse brain in stereotaxic coordinates*.  
616 Amsterdam: Academic Press, an imprint of Elsevier. 1 volume (unpaged) pp.
- 617 Galloni AR, Laffere A, Rancz E. 2020. Apical length governs computational diversity of layer 5 pyramidal  
618 neurons. *Elife* 9
- 619 Garrett ME, Nauhaus I, Marshel JH, Callaway EM. 2014. Topography and areal organization of mouse  
620 visual cortex. *J Neurosci* 34: 12587-600
- 621 Glickfeld LL, Olsen SR. 2017. Higher-Order Areas of the Mouse Visual Cortex. *Annu Rev Vis Sci* 3: 251-  
622 73
- 623 Groh A, Meyer HS, Schmidt EF, Heintz N, Sakmann B, Krieger P. 2010. Cell-type specific properties of  
624 pyramidal neurons in neocortex underlying a layout that is modifiable depending on the cortical  
625 area. *Cereb Cortex* 20: 826-36
- 626 Guerguiev J, Lillicrap TP, Richards BA. 2017. Towards deep learning with segregated dendrites. *Elife* 6
- 627 Hamilton DA, Briggman JL. 2015. Behavioral flexibility in rats and mice: contributions of distinct  
628 frontocortical regions. *Genes Brain Behav* 14: 4-21
- 629 Han Y, Krebschull JM, Campbell RAA, Cowan D, Imhof F, et al. 2018. The logic of single-cell projections  
630 from visual cortex. *Nature* 556: 51-56
- 631 Harris JA, Mihalas S, Hirokawa KE, Whitesell JD, Choi H, et al. 2019. Hierarchical organization of cortical  
632 and thalamic connectivity. *Nature* 575: 195-202
- 633 Helmstaedter M, Briggman KL, Turaga SC, Jain V, Seung HS, Denk W. 2013. Connectomic  
634 reconstruction of the inner plexiform layer in the mouse retina. *Nature* 500: 168-74
- 635 Hooks BM, Mao T, Gutnisky DA, Yamawaki N, Svoboda K, Shepherd GM. 2013. Organization of cortical  
636 and thalamic input to pyramidal neurons in mouse motor cortex. *J Neurosci* 33: 748-60
- 637 Hubel DH, Wiesel TN. 1962. Receptive fields, binocular interaction and functional architecture in the cat's  
638 visual cortex. *J Physiol* 160: 106-54
- 639 Jarsky T, Roxin A, Kath WL, Spruston N. 2005. Conditional dendritic spike propagation following distal  
640 synaptic activation of hippocampal CA1 pyramidal neurons. *Nat Neurosci* 8: 1667-76
- 641 Kasthuri N, Hayworth KJ, Berger DR, Schalek RL, Conchello JA, et al. 2015. Saturated Reconstruction of  
642 a Volume of Neocortex. *Cell* 162: 648-61
- 643 Kim EJ, Juavinett AL, Kyubwa EM, Jacobs MW, Callaway EM. 2015. Three Types of Cortical Layer 5  
644 Neurons That Differ in Brain-wide Connectivity and Function. *Neuron* 88: 1253-67
- 645 Kim JS, Greene MJ, Zlateski A, Lee K, Richardson M, et al. 2014. Space-time wiring specificity supports  
646 direction selectivity in the retina. *Nature* 509: 331-36

- 647 Klein S, Staring M, Murphy K, Viergever MA, Pluim JP. 2010. elastix: a toolbox for intensity-based  
648 medical image registration. *IEEE Trans Med Imaging* 29: 196-205
- 649 Krishnaswamy A, Yamagata M, Duan X, Hong YK, Sanes JR. 2015. Sidekick 2 directs formation of a  
650 retinal circuit that detects differential motion. *Nature* 524: 466-70
- 651 Larkum M. 2013. A cellular mechanism for cortical associations: an organizing principle for the cerebral  
652 cortex. *Trends Neurosci* 36: 141-51
- 653 Larkum ME, Petro LS, Sachdev RNS, Muckli L. 2018. A Perspective on Cortical Layering and Layer-  
654 Spanning Neuronal Elements. *Front Neuroanat* 12: 56
- 655 LeCun Y, Bengio Y, Hinton G. 2015. Deep learning. *Nature* 521: 436-44
- 656 Lee WC, Bonin V, Reed M, Graham BJ, Hood G, et al. 2016. Anatomy and function of an excitatory  
657 network in the visual cortex. *Nature* 532: 370-4
- 658 Lyamzin D, Benucci A. 2019. The mouse posterior parietal cortex: Anatomy and functions. *Neurosci Res*  
659 140: 14-22
- 660 Niedworok CJ, Brown AP, Jorge Cardoso M, Osten P, Ourselin S, et al. 2016. aMAP is a validated  
661 pipeline for registration and segmentation of high-resolution mouse brain data. *Nat Commun* 7:  
662 11879
- 663 Osten P, Margrie TW. 2013. Mapping brain circuitry with a light microscope. *Nat Methods* 10: 515-23
- 664 Packer AM, McConnell DJ, Fino E, Yuste R. 2013. Axo-dendritic overlap and laminar projection can  
665 explain interneuron connectivity to pyramidal cells. *Cereb Cortex* 23: 2790-802
- 666 Petreanu L, Mao T, Sternson SM, Svoboda K. 2009. The subcellular organization of neocortical excitatory  
667 connections. *Nature* 457: 1142-5
- 668 Powell A, Connelly WM, Vasalaukaite A, Nelson AJD, Vann SD, et al. 2020. Stable Encoding of Visual  
669 Cues in the Mouse Retrosplenial Cortex. *Cereb Cortex* 30: 4424-37
- 670 Ragan T, Kadiri LR, Venkataraju KU, Bahlmann K, Sutin J, et al. 2012. Serial two-photon tomography for  
671 automated ex vivo mouse brain imaging. *Nat Methods* 9: 255-8
- 672 Rancz EA, Moya J, Drawitsch F, Brichta AM, Canals S, Margrie TW. 2015. Widespread vestibular  
673 activation of the rodent cortex. *J Neurosci* 35: 5926-34
- 674 Reardon TR, Murray AJ, Turi GF, Wirblich C, Croce KR, et al. 2016. Rabies Virus CVS-N2c(DeltaG)  
675 Strain Enhances Retrograde Synaptic Transfer and Neuronal Viability. *Neuron* 89: 711-24
- 676 Rees CL, Moradi K, Ascoli GA. 2017. Weighing the Evidence in Peters' Rule: Does Neuronal Morphology  
677 Predict Connectivity? *Trends Neurosci* 40: 63-71
- 678 Richards BA, Lillicrap TP, Beaudoin P, Bengio Y, Bogacz R, et al. 2019. A deep learning framework for  
679 neuroscience. *Nat Neurosci* 22: 1761-70
- 680 Rieubland S, Roth A, Hausser M. 2014. Structured connectivity in cerebellar inhibitory networks. *Neuron*  
681 81: 913-29
- 682 Rockland KS, Pandya DN. 1979. Laminar origins and terminations of cortical connections of the occipital  
683 lobe in the rhesus monkey. *Brain Res* 179: 3-20
- 684 Rogers A, Beier KT. 2021. Can transsynaptic viral strategies be used to reveal functional aspects of  
685 neural circuitry? *J Neurosci Methods* 348: 109005
- 686 Romand S, Wang Y, Toledo-Rodriguez M, Markram H. 2011. Morphological development of thick-tufted  
687 layer v pyramidal cells in the rat somatosensory cortex. *Front Neuroanat* 5: 5
- 688 Roth MM, Dahmen JC, Muir DR, Imhof F, Martini FJ, Hofer SB. 2016. Thalamic nuclei convey diverse  
689 contextual information to layer 1 of visual cortex. *Nat Neurosci* 19: 299-307
- 690 Rothman JS, Silver RA. 2018. NeuroMatic: An Integrated Open-Source Software Toolkit for Acquisition,  
691 Analysis and Simulation of Electrophysiological Data. *Front Neuroinform* 12: 14
- 692 Schaefer AT, Larkum ME, Sakmann B, Roth A. 2003. Coincidence Detection in Pyramidal Neurons Is  
693 Tuned by Their Dendritic Branching Pattern. *Journal of Neurophysiology* 89: 3143-54
- 694 Schindelin J, Arganda-Carreras I, Frise E, Kaynig V, Longair M, et al. 2012. Fiji: an open-source platform  
695 for biological-image analysis. *Nat Methods* 9: 676-82
- 696 Shipp S. 2016. Neural Elements for Predictive Coding. *Front Psychol* 7: 1792
- 697 Sun B, Lv B, Dong Q, Wang S, Chai Z. 2009. Watching moving images specifically promotes  
698 development of medial area of secondary visual cortex in rat. *Dev Neurobiol* 69: 558-67
- 699 Takahashi N, Ebner C, Sigl-Glockner J, Moberg S, Nierwetberg S, Larkum ME. 2020. Active dendritic  
700 currents gate descending cortical outputs in perception. *Nat Neurosci* 23: 1277-85
- 701 Takahashi N, Oertner TG, Hegemann P, Larkum ME. 2016. Active cortical dendrites modulate perception.  
702 *Science* 354: 1587-90



- 703 Taube JS. 2007. The head direction signal: origins and sensory-motor integration. *Annu Rev Neurosci* 30:  
704 181-207
- 705 Tyson AL, Rousseau CV, Niedworok CJ, Keshavarzi S, Tsitoura C, Margrie TW. 2020.
- 706 Velez-Fort M, Bracey EF, Keshavarzi S, Rousseau CV, Cossell L, et al. 2018. A Circuit for Integration of  
707 Head- and Visual-Motion Signals in Layer 6 of Mouse Primary Visual Cortex. *Neuron* 98: 179-91  
708 e6
- 709 Wang Q, Ding SL, Li Y, Royall J, Feng D, et al. 2020a. The Allen Mouse Brain Common Coordinate  
710 Framework: A 3D Reference Atlas. *Cell* 181: 936-53 e20
- 711 Wang XJ, Pereira U, Rosa MG, Kennedy H. 2020b. Brain connectomes come of age. *Curr Opin*  
712 *Neurobiol* 65: 152-61
- 713 Wickersham IR, Lyon DC, Barnard RJ, Mori T, Finke S, et al. 2007. Monosynaptic restriction of  
714 transsynaptic tracing from single, genetically targeted neurons. *Neuron* 53: 639-47
- 715 Yamawaki N, Li X, Lambot L, Ren LY, Radulovic J, Shepherd GMG. 2019. Long-range inhibitory  
716 intersection of a retrosplenial thalamocortical circuit by apical tuft-targeting CA1 neurons. *Nat*  
717 *Neurosci* 22: 618-26
- 718 Young H, Belbut B, Baeta M, Petreanu L. 2021. Laminar-specific cortico-cortical loops in mouse visual  
719 cortex. *Elife* 10
- 720 Zeng H. 2018. Mesoscale connectomics. *Curr Opin Neurobiol* 50: 154-62
- 721 Zhang S, Xu M, Kamigaki T, Hoang Do JP, Chang WC, et al. 2014. Selective attention. Long-range and  
722 local circuits for top-down modulation of visual cortex processing. *Science* 345: 660-5
- 723

724 **Supplementary material**

725

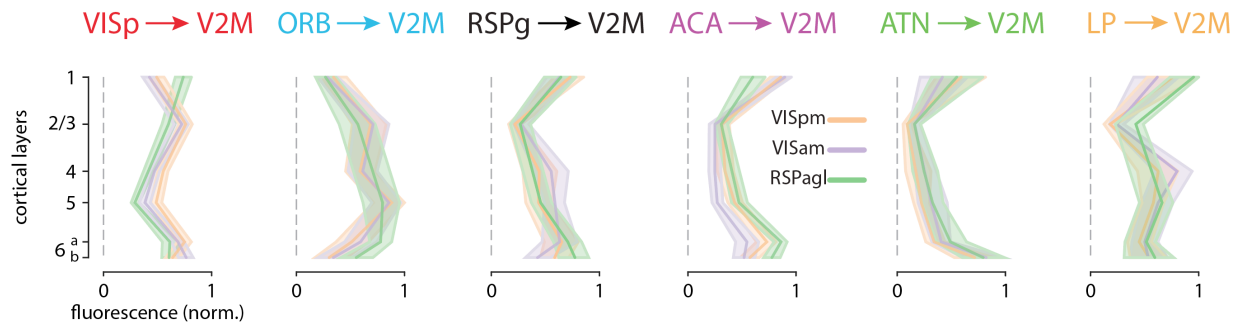

727 **Figure S1. Comparison of axonal projection profiles.** Layer-wise axonal projection profiles to VISpm, VISam and  
728 RSPagl. Data from the Allen Mouse Brain Connectivity Atlas.

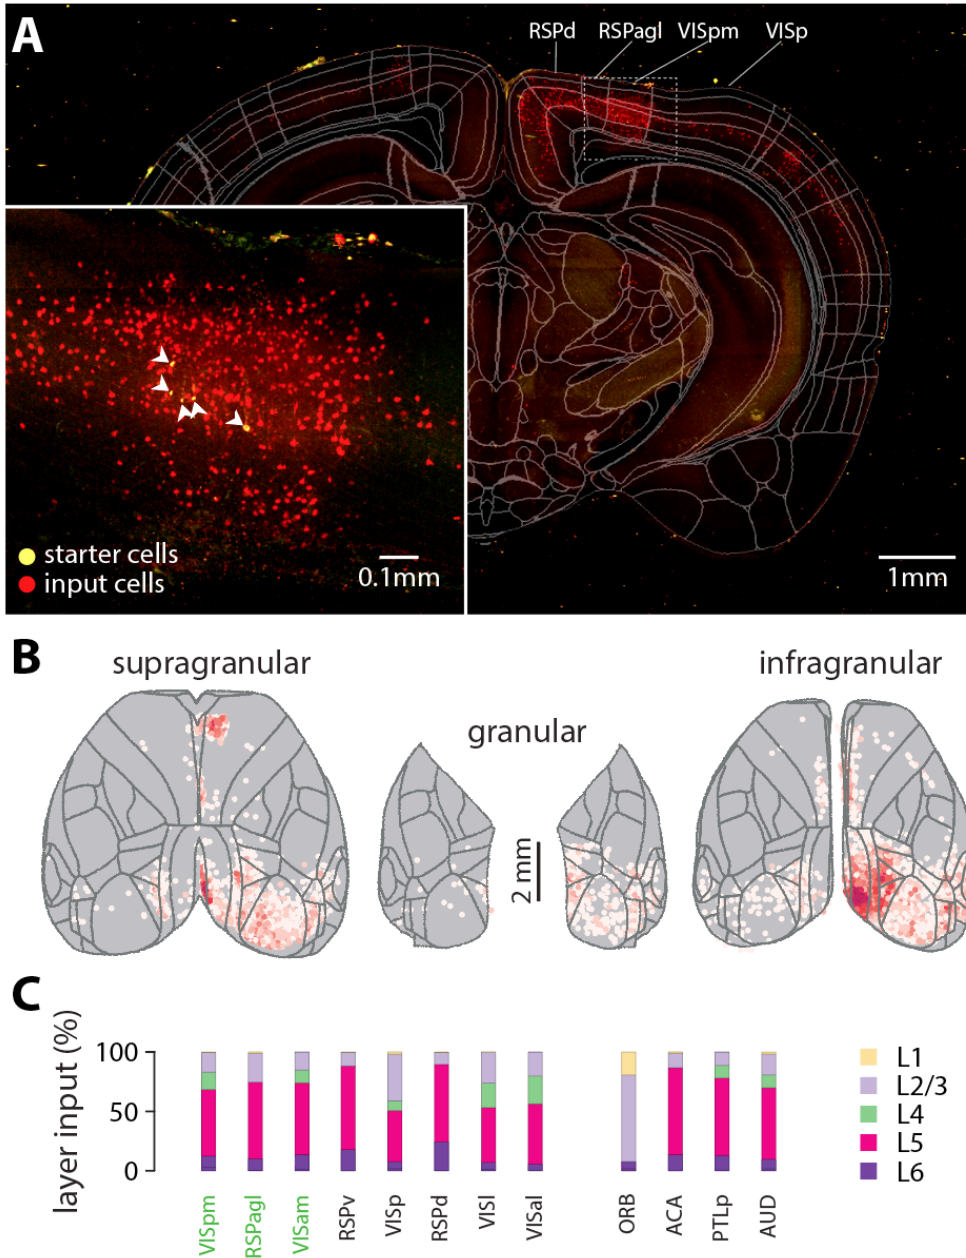

729  
730  
731  
732  
733  
734  
735

**Figure S2.** **A.** Maximum intensity projection of a 200  $\mu$ m thick coronal slab containing some of the starter neurons. The propagated CCFv3 atlas outlines are overlaid. Inset shows starter area with higher magnification. **B.** Input cell density maps across supragranular, granular and infragranular layers. A-B Same experiment and scales as Figure 1. **C.** Distribution of input cells across cortical layers. Average of 3 experiments.

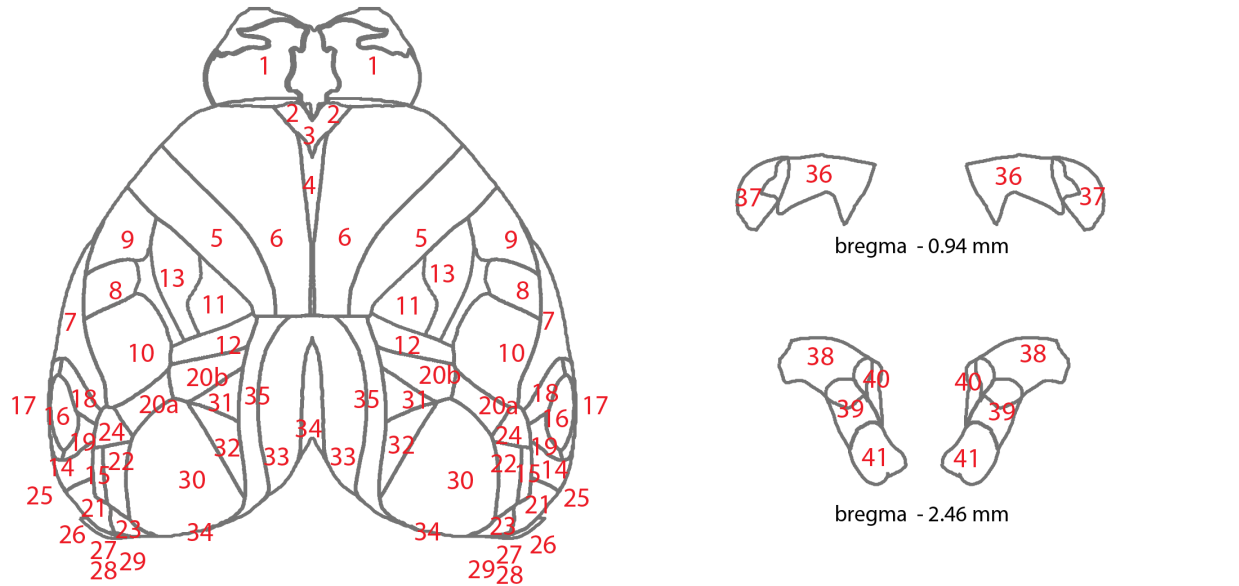

### Cortex

|    |                                          |         |     |                                            |        |
|----|------------------------------------------|---------|-----|--------------------------------------------|--------|
| 1  | Main olfactory bulb                      | MOB     | 20  | Posterior parietal association areas       | PTLp   |
| 2  | Orbital area                             | ORB     | 20a | Rostrolateral visual area                  | VISrl  |
| 3  | Prelimbic area                           | PL      | 20b | Anterior area                              | VISa   |
| 4  | Anterior cingulate area                  | ACA     | 21  | Postrhinal area                            | VISpor |
| 5  | Primary motor area                       | MOp     | 22  | Lateral visual area                        | VISI   |
| 6  | Secondary motor area                     | MOs     | 23  | Posterolateral visual area                 | VISpl  |
| 7  | Supplemental somatosensory area          | SSs     | 24  | Anterolateral visual area                  | VISal  |
| 8  | Primary somatosensory area, nose         | SSp-n   | 25  | Ectorhinal area                            | ECT    |
| 9  | Primary somatosensory area, mouth        | SSp-m   | 26  | Entorhinal area                            | ENT    |
| 10 | Primary somatosensory area, barrel field | SSp-bfd | 27  | Presubiculum                               | PRE    |
| 11 | Primary somatosensory area, lower limb   | SSp-ll  | 28  | Postsubiculum                              | POST   |
| 12 | Primary somatosensory area, trunk        | SSp-tr  | 29  | Area prostriata                            | Apr    |
| 13 | Primary somatosensory area, upper limb   | SSp-ul  | 30  | Primary visual area                        | VISp   |
| 14 | Temporal association areas               | TEa     | 31  | Anteromedial visual area                   | VISam  |
| 15 | Laterointermediate area                  | VISli   | 32  | posteromedial visual area                  | VISpm  |
| 16 | Primary auditory area                    | AUDp    | 33  | Retrosplenial area, dorsal part            | RSPd   |
| 17 | Ventral auditory area                    | AUDv    | 34  | Retrosplenial area, ventral part           | RSPv   |
| 18 | Dorsal auditory area                     | AUDd    | 35  | Retrosplenial area, lateral agranular part | RSPagl |
| 19 | Posterior auditory area                  | AUDpo   |     |                                            |        |

### Thalamus

|    |                                               |     |    |                                   |    |
|----|-----------------------------------------------|-----|----|-----------------------------------|----|
| 36 | Lateral posterior nucleus of the thalamus     | LP  | 39 | Anteroventral nucleus of thalamus | AV |
| 37 | Dorsal part of the lateral geniculate complex | LGd | 40 | Anterodorsal nucleus              | AD |
| 38 | Lateral dorsal nucleus of thalamus            | LD  | 41 | Anteromedial nucleus              | AM |

736

737

738 **Figure S3.** Brain segmentation and nomenclature according to the Allen CCFv3.

739

| Number of input cells         |         |     |          |          |          |           |             |           |           |            |            |
|-------------------------------|---------|-----|----------|----------|----------|-----------|-------------|-----------|-----------|------------|------------|
| thalamus                      | average | sd  | sample 1 | sample 2 | sample 3 |           |             |           |           |            |            |
| LP                            | 1191    | 191 | 1409     | 1052     | 1111     |           |             |           |           |            |            |
| ATN                           | 1001    | 417 | 1465     | 657      | 882      |           |             |           |           |            |            |
| LGd                           | 194     | 174 | 366      | 198      | 19       |           |             |           |           |            |            |
| <b>Layerwise contribution</b> |         |     |          |          |          |           |             |           |           |            |            |
| <b>proximal cortex</b>        |         |     |          |          |          | <b>L1</b> | <b>L2/3</b> | <b>L4</b> | <b>L5</b> | <b>L6a</b> | <b>L6b</b> |
| VISp                          | 1245    | 282 | 954      | 1262     | 1518     | 1.83%     | 39.36%      | 8.10%     | 42.97%    | 5.97%      | 1.77%      |
| VISpm                         | 842     | 264 | 687      | 692      | 1146     | 0.28%     | 16.63%      | 14.62%    | 55.98%    | 9.68%      | 2.80%      |
| VISam                         | 418     | 227 | 234      | 348      | 672      | 0.00%     | 15.12%      | 10.75%    | 60.37%    | 12.43%     | 1.32%      |
| VISI                          | 334     | 144 | 170      | 392      | 439      | 0.17%     | 25.97%      | 20.55%    | 46.06%    | 5.92%      | 1.33%      |
| VISal                         | 118     | 65  | 46       | 174      | 133      | 0.00%     | 20.08%      | 23.55%    | 50.62%    | 5.36%      | 0.40%      |
| RSPv                          | 1825    | 844 | 2705     | 1022     | 1747     | 0.29%     | 11.40%      | n/a       | 70.43%    | 17.87%     | 0.01%      |
| RSPd                          | 1038    | 314 | 1256     | 678      | 1180     | 0.29%     | 9.97%       | n/a       | 65.15%    | 24.45%     | 0.14%      |
| RSPagl                        | 785     | 353 | 967      | 378      | 1010     | 1.14%     | 24.25%      | n/a       | 64.46%    | 9.96%      | 0.19%      |
| <b>distal cortex</b>          |         |     |          |          |          |           |             |           |           |            |            |
| ORB                           | 305     | 117 | 181      | 320      | 414      | 19.25%    | 72.86%      | n/a       | 6.22%     | 1.67%      | 0.00%      |
| ACA                           | 252     | 161 | 189      | 131      | 435      | 0.96%     | 12.20%      | n/a       | 73.28%    | 13.56%     | 0.00%      |
| PTLp                          | 221     | 87  | 120      | 266      | 276      | 0.00%     | 11.16%      | 10.62%    | 65.23%    | 12.60%     | 0.39%      |
| AUD                           | 177     | 28  | 145      | 195      | 192      | 1.58%     | 17.60%      | 10.83%    | 60.17%    | 8.18%      | 1.64%      |

740

741 **Supplementary table 1.** Results of rabies tracing experiments.

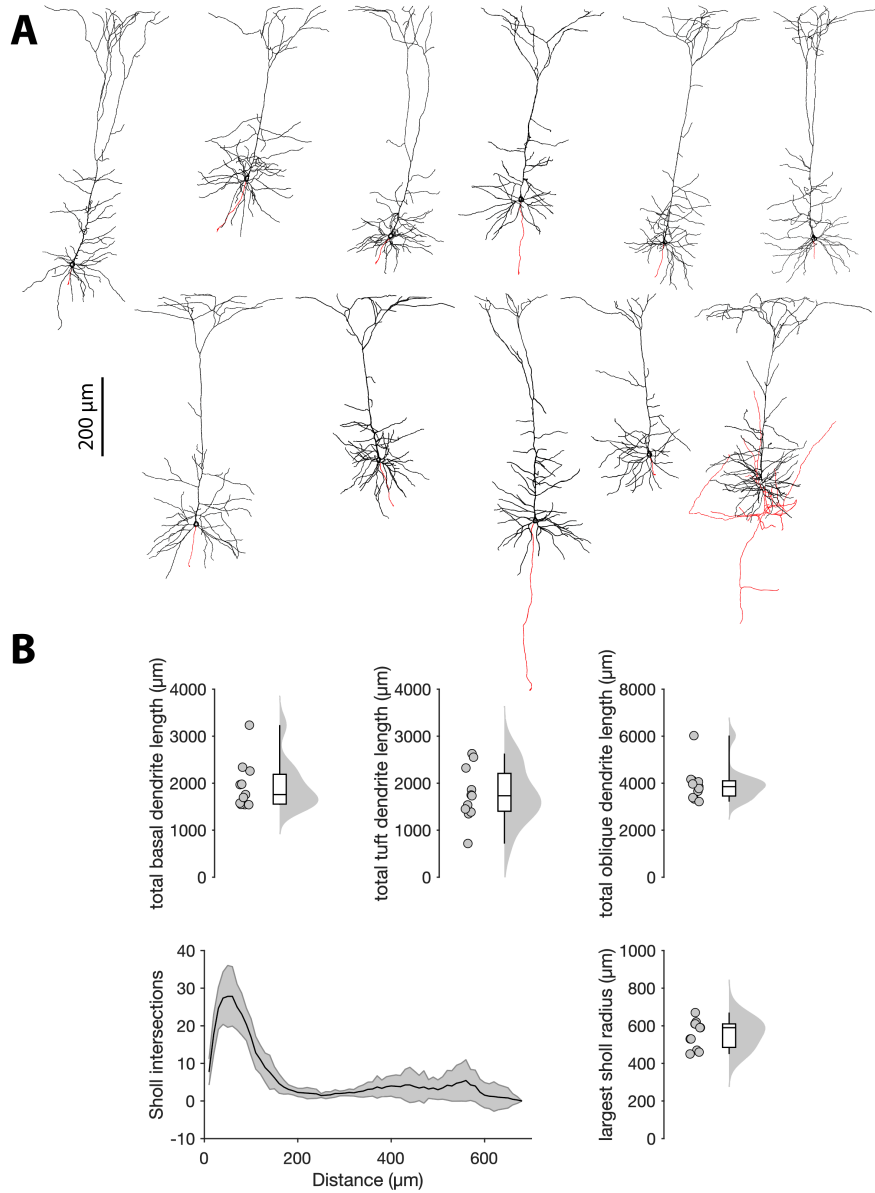

742

743 **Figure S4. A.** Reconstructed morphologies of 11 Colgalt-2 neurons. Black: dendrites; red: axons. **B.** Quantitative  
744 descriptive measures of dendritic morphology.

745

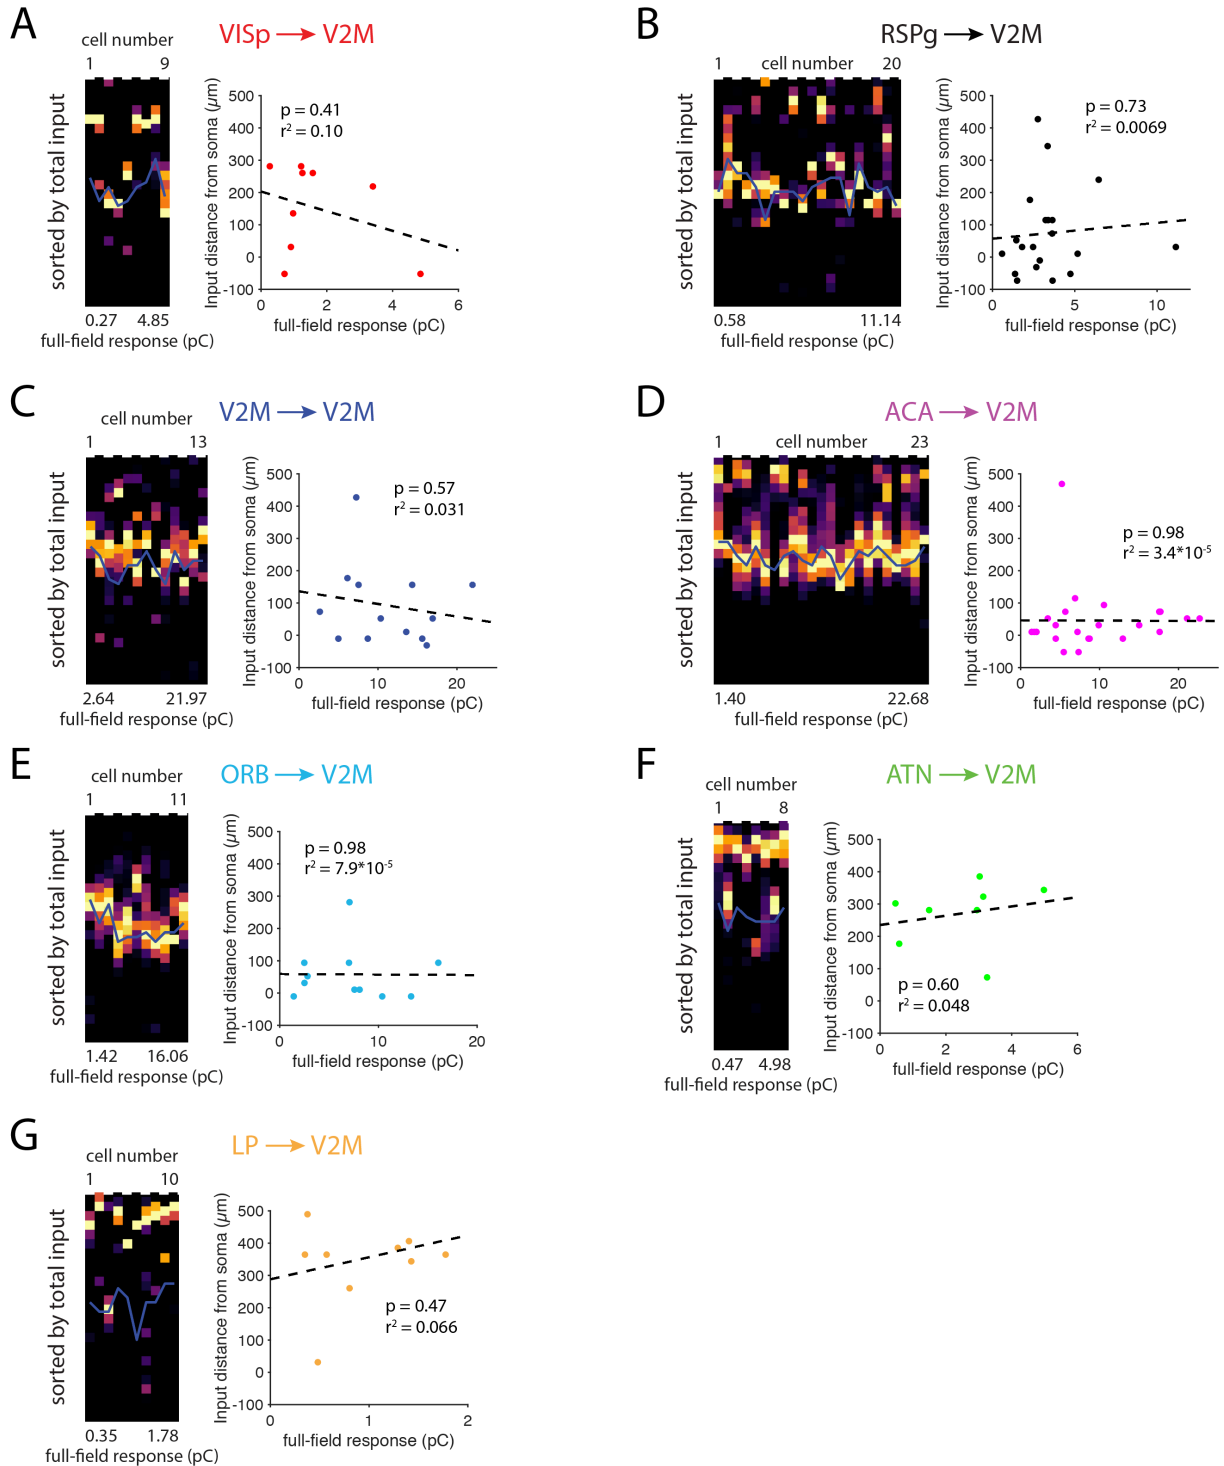

746

747

748

749

750

**Figure S5. Input location does not correlate with input strength.** **A.** Horizontal projections of VISp input to individual cells sorted by full-field stimulation response. Right: Location of the largest input peak versus full-field response. Dashed line is a linear fit. **B-G.** Same as in A, but for RSPg, V2M, ACA, ORB, ATN and LP input.

751  
752

| input area                     | parameter                            | basal      | oblique    | tuft*      |                              |              |
|--------------------------------|--------------------------------------|------------|------------|------------|------------------------------|--------------|
| <b>VISp</b><br>N = 6<br>n = 9  | peak location ( $\mu\text{m}$ )      | -62.5      | 104.17     | 187.5      | total input (pC)             | 0.93         |
|                                | input proportion (%)                 | 26%        | 33%        | 42%        | total input SEM              | 0.11         |
|                                | proportional input (pC)              | 0.24       | 0.30       | 0.39       | soma depth ( $\mu\text{m}$ ) | 507 $\pm$ 22 |
|                                | horizontal bias ( $\mu\text{m}$ ) ** | 62.5       | 41.67      | -20.83     | cells with peak in tuft      | 5/9          |
| <b>V2M</b><br>N = 4<br>n = 13  | peak location ( $\mu\text{m}$ )      | -41.67     | 83.33      | 166.67     | total input (pC)             | 11.24        |
|                                | input proportion (%)                 | 24%        | 62%        | 14%        | total input SEM              | 1.56         |
|                                | proportional input (pC)              | 2.68       | 6.96       | 1.60       | soma depth ( $\mu\text{m}$ ) | 498 $\pm$ 15 |
|                                | horizontal bias ( $\mu\text{m}$ ) ** | 20.83      | 20.83      | -20.83     | cells with peak in tuft      | 1/13         |
| <b>RSPg</b><br>N = 9<br>n = 20 | peak location ( $\mu\text{m}$ )      | -41.67     | 41.67      | 125        | total input (pC)             | 3.40         |
|                                | input proportion (%)                 | 30%        | 40%        | 30%        | total input SEM              | 0.51         |
|                                | proportional input (pC)              | 1.04       | 1.36       | 1.01       | soma depth ( $\mu\text{m}$ ) | 503 $\pm$ 15 |
|                                | horizontal bias ( $\mu\text{m}$ ) ** | 20.83      | 20.83      | 0          | cells with peak in tuft      | 2/20         |
| <b>ACA</b><br>N = 5<br>n = 23  | peak location ( $\mu\text{m}$ )      | -41.67     | 41.67      | 83.33      | total input (pC)             | 9.46         |
|                                | input proportion (%)                 | 30%        | 45%        | 25%        | total input SEM              | 1.32         |
|                                | proportional input (pC)              | 2.83       | 4.22       | 2.41       | soma depth ( $\mu\text{m}$ ) | 464 $\pm$ 9  |
|                                | horizontal bias ( $\mu\text{m}$ ) ** | 0          | 0          | -20.83     | cells with peak in tuft      | 1/23         |
| <b>ORB</b><br>N = 3<br>n = 11  | peak location ( $\mu\text{m}$ )      | -41.67     | 20.83      | N/A        | total input (pC)             | 7.16         |
|                                | input proportion (%)                 | 35%        | 57%        | 9%         | total input SEM              | 1.43         |
|                                | proportional input (pC)              | 2.47       | 4.05       | 0.63       | soma depth ( $\mu\text{m}$ ) | 521 $\pm$ 19 |
|                                | horizontal bias ( $\mu\text{m}$ ) ** | 0          | 20.83      | 0          | cells with peak in tuft      | 0/11         |
| <b>ATN</b><br>N = 3<br>n = 8   | peak location ( $\mu\text{m}$ )      | -104.17    | 104.17     | 104.17     | total input (pC)             | 2.48         |
|                                | input proportion (%)                 | 8%         | 17%        | 75%        | total input SEM              | 0.54         |
|                                | proportional input (pC)              | 0.21       | 0.42       | 1.86       | soma depth ( $\mu\text{m}$ ) | 435 $\pm$ 15 |
|                                | horizontal bias ( $\mu\text{m}$ ) ** | 20.83      | 41.67      | 20.83      | cells with peak in tuft      | 6/8          |
| <b>LP</b><br>N = 4<br>n = 10   | peak location ( $\mu\text{m}$ )      | -41.67     | 20.83      | 62.5       | total input (pC)             | 0.97         |
|                                | input proportion (%)                 | 10%        | 15%        | 75%        | total input SEM              | 0.16         |
|                                | proportional input (pC)              | 0.10       | 0.14       | 0.72       | soma depth ( $\mu\text{m}$ ) | 500 $\pm$ 23 |
|                                | horizontal bias ( $\mu\text{m}$ ) ** | -41.67     | -20.83     | -83.33     | cells with peak in tuft      | 9/10         |
|                                | <b>total proportional input</b>      | <b>27%</b> | <b>49%</b> | <b>24%</b> | <b>sum total input (pC)</b>  | <b>35.65</b> |

\*tuft measurements from pia, basal and oblique from soma

\*\* negative means lateral, positive medial

753  
754

**Supplementary table 2.** Results of all sCRACM experiments.



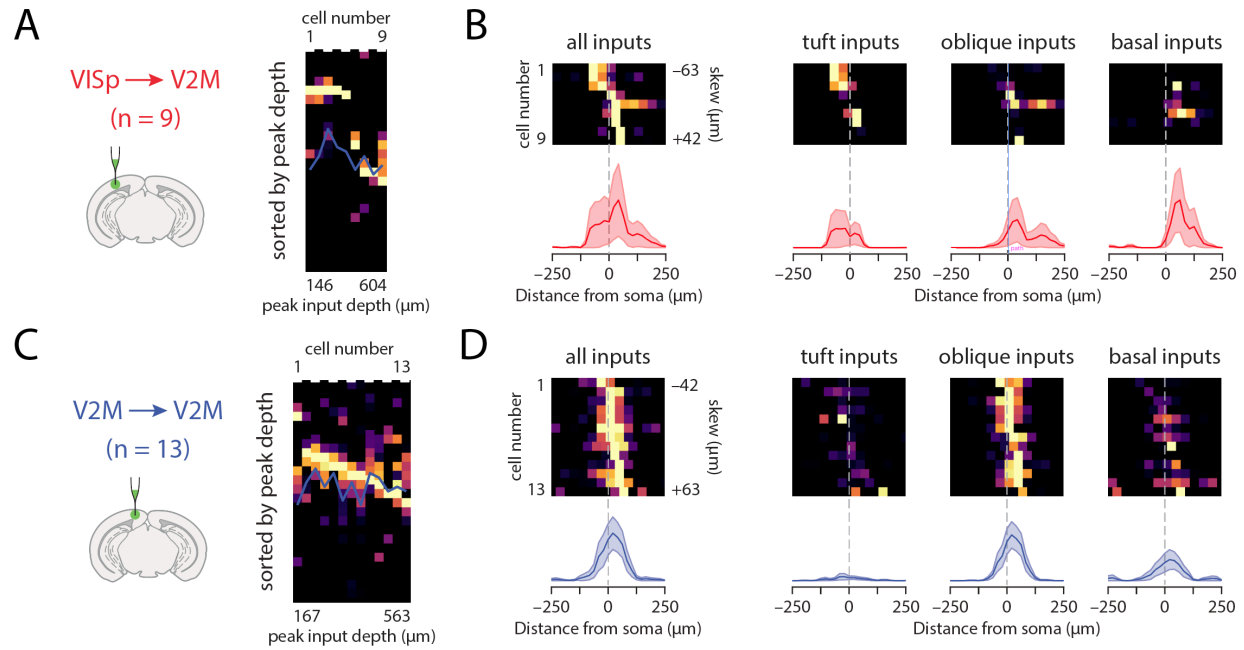

755

756 **Figure S6. Detailed data analysis for VISp and V2M.** **A, C.** Vertical projections of individual input maps sorted by  
757 the location of the peak input. **B, D.** Horizontal projections of individual input maps and their average for all inputs,  
758 and for domain-separated inputs.

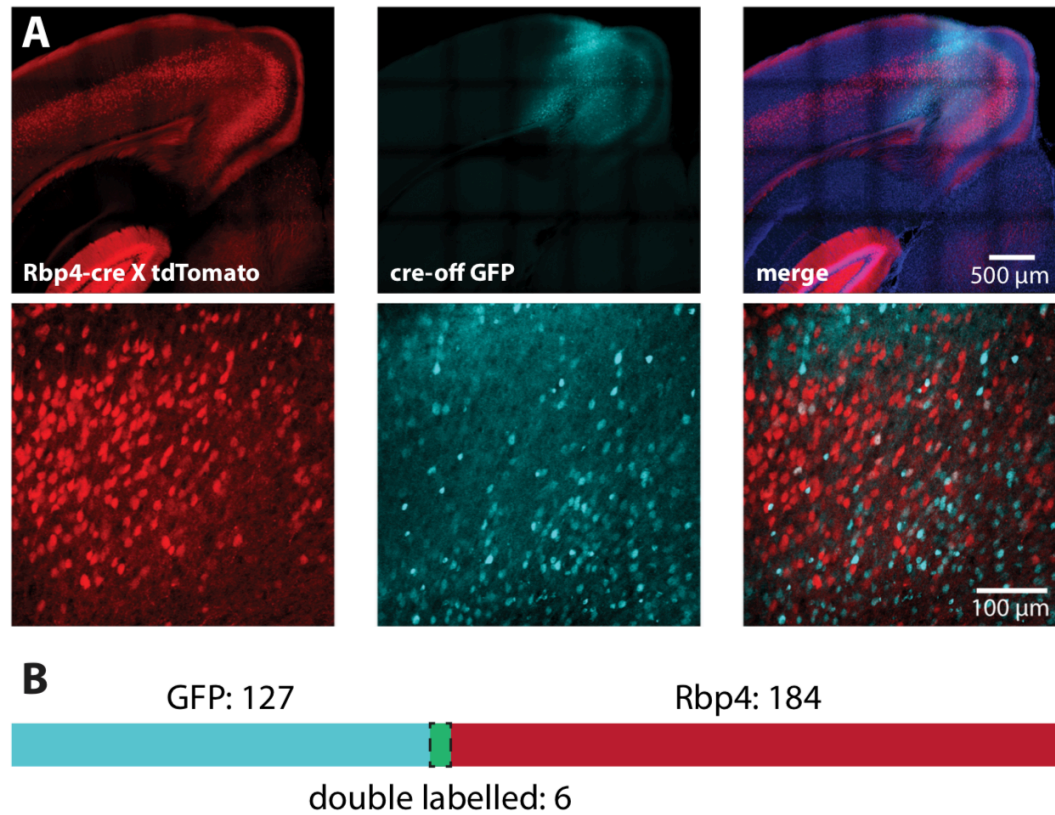

759

760 **Figure S7. Efficacy of Cre-off virus.** **A.** Example confocal images showing cre expression in L5 pyramidal neurons

761 (red), GFP expression following cre-off virus injection (cyan) and overlap (blue = DAPI) on two magnifications. **B.**

762 Quantification of overlap between cre and GFP expression.

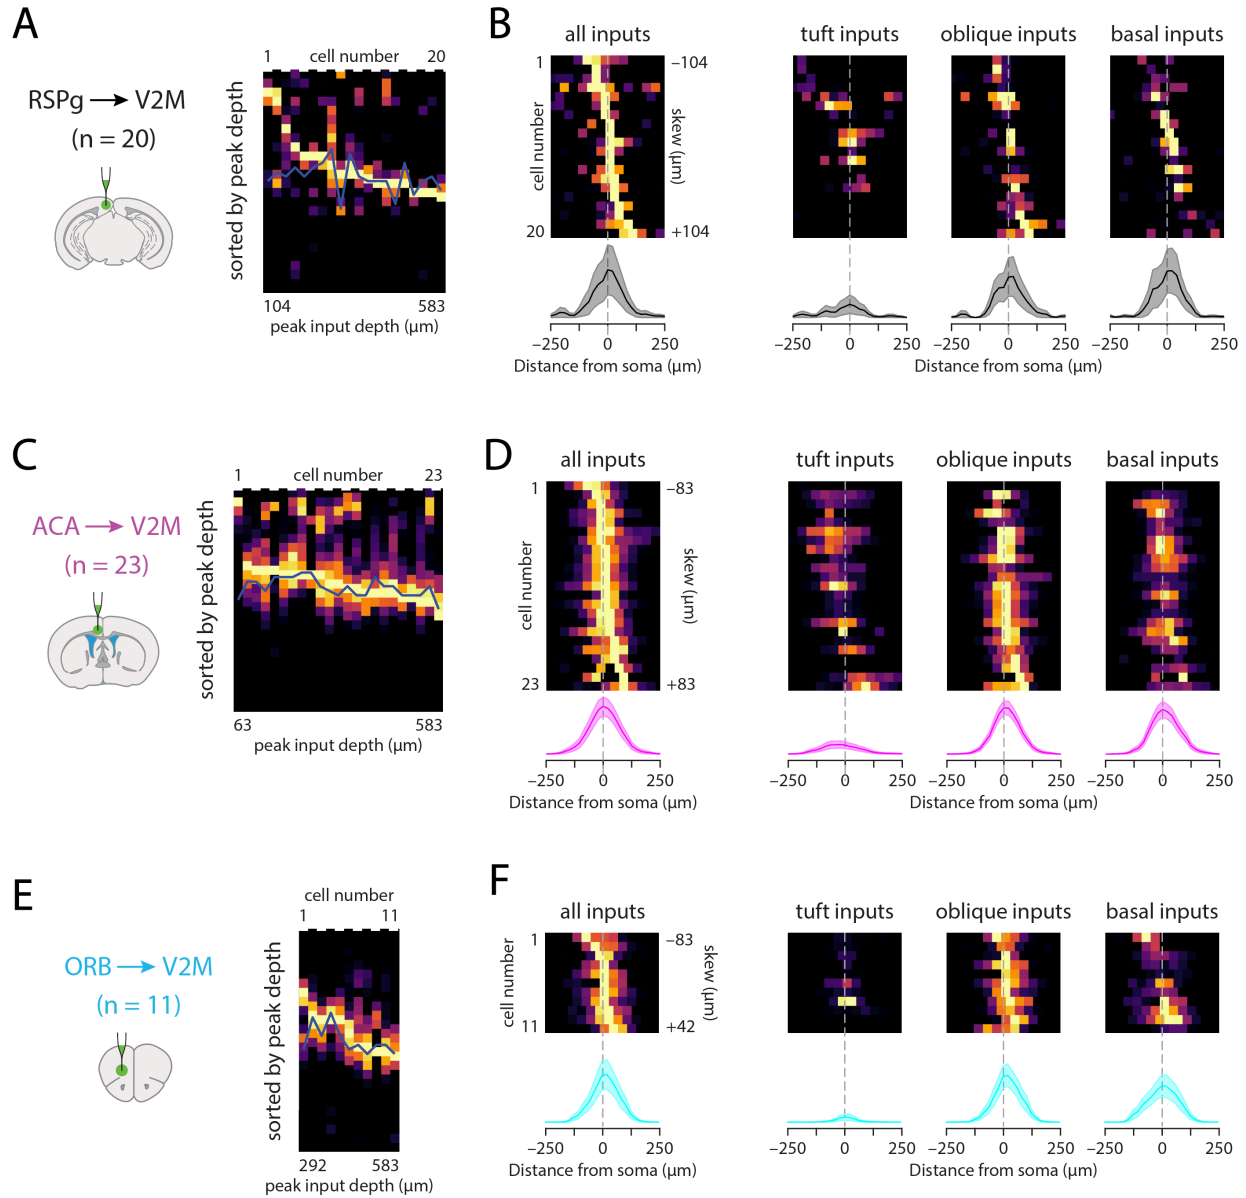

763

764 **Figure S8. Detailed data analysis for RSPg, ACA and ORB.** A, C, E. Vertical projections of individual input maps  
 765 sorted by the location of the peak input. B, D, F. Horizontal projections of individual input maps and their average for  
 766 all inputs, and for domain-separated inputs.

767

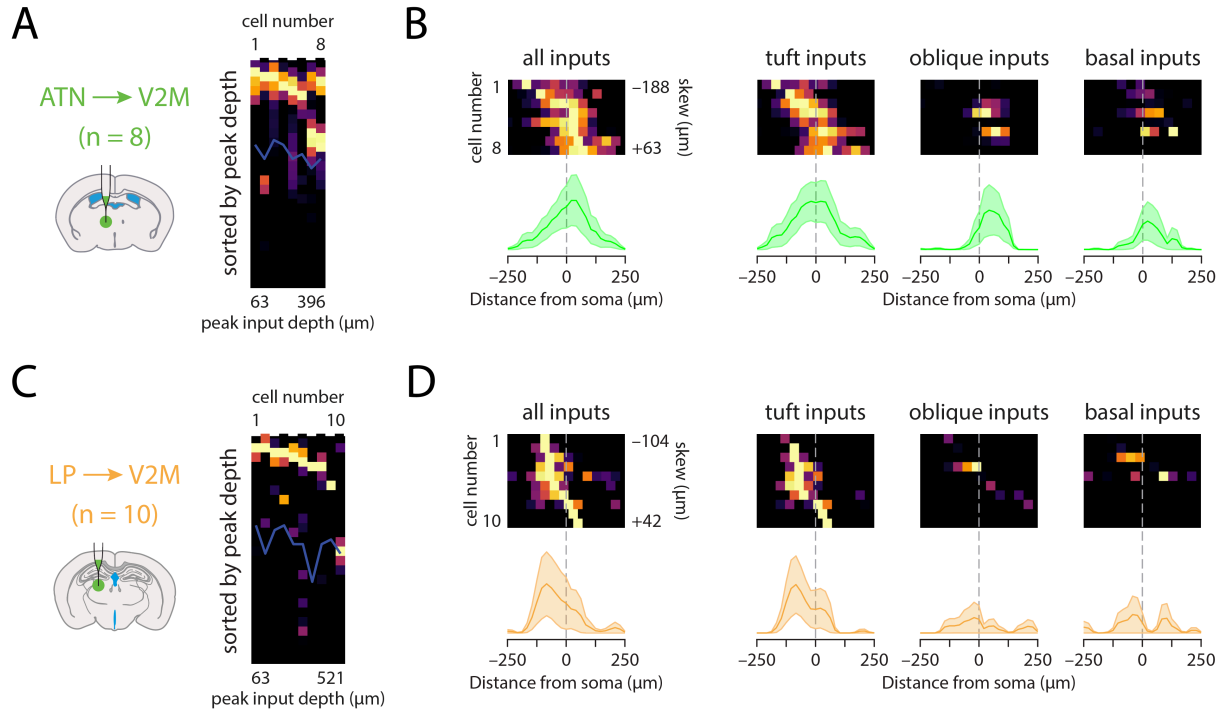

768

769 **Figure S9. Detailed data analysis for ATN and LP. A, C.** Vertical projections of individual input maps sorted by the  
770 location of the peak input. **B, D.** Horizontal projections of individual input maps and their average for all inputs, and for  
771 domain-separated inputs

772

| Area | Distance from bregma (mm) | Mediolateral distance (mm) | Depth from pia (mm) | Number & volume of injections |
|------|---------------------------|----------------------------|---------------------|-------------------------------|
| VISp | [-3.5 : -2.8]             | [1.8 : 2.7]                | [0.5 : 0.6]         | 3 x 100 nL                    |
| RSPg | [-3.2 : -2.7]             | 0.5                        | [0.5 : 0.7]         | 2 x 100 nL                    |
| V2m  | [-3.2 : -2.7]             | 1                          | [0.2 : 0.5]         | 2 x 100 nL                    |
| ACA  | [0 : 1]                   | 0.5                        | [1.2 : 1.5]         | 3 x 100 nL                    |
| ORB  | [2 : 2.8]                 | 1                          | [1.5 : 2.3]         | 3 x 100 nL                    |
| ATN  | [-0.5 : -1.2]             | [0.5 : 0.7]                | [3.2 : 3.3]         | 2 x 100 nL                    |
| LP   | [-2.5 : -1.7]             | [1 : 1.5]                  | [2.4 : 2.6]         | 3 x 100 nL                    |

773  
774  
775

**Supplementary table 3.** Stereotaxic coordinates and volumes of viral injections.
